# Supplementary material for: NSAID use and clinical outcomes in COVID-19 patients: A 38-center retrospective cohort study
Source: PubMed Central journal article supplement — medRxiv. 2021 Dec 22:2021.04.13.21255438. Originally published 2021 Apr 20. Preprint. [Version 2] doi: 10.1101/2021.04.13.21255438 (PMC8077581; doi:10.1101/2021.04.13.21255438), 2021-12-22
Supplement: media-1.pdf [file media-1.pdf]

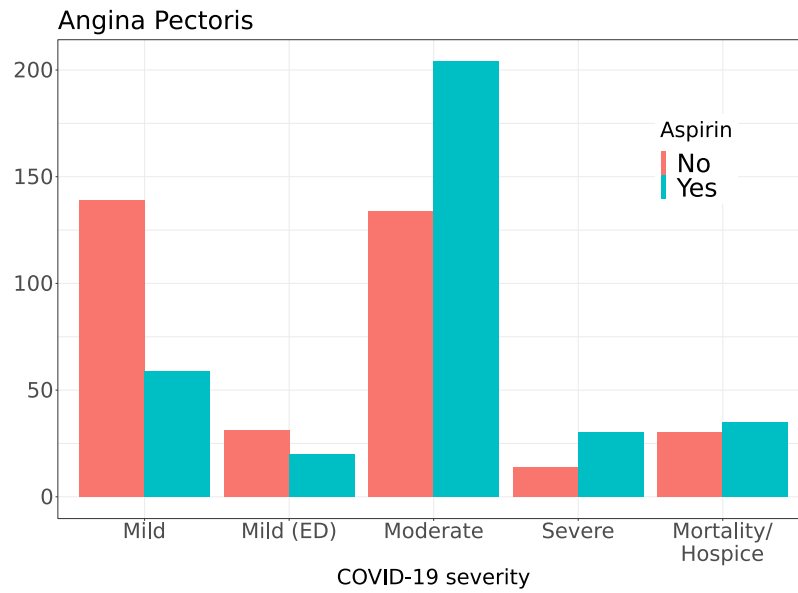

(a)

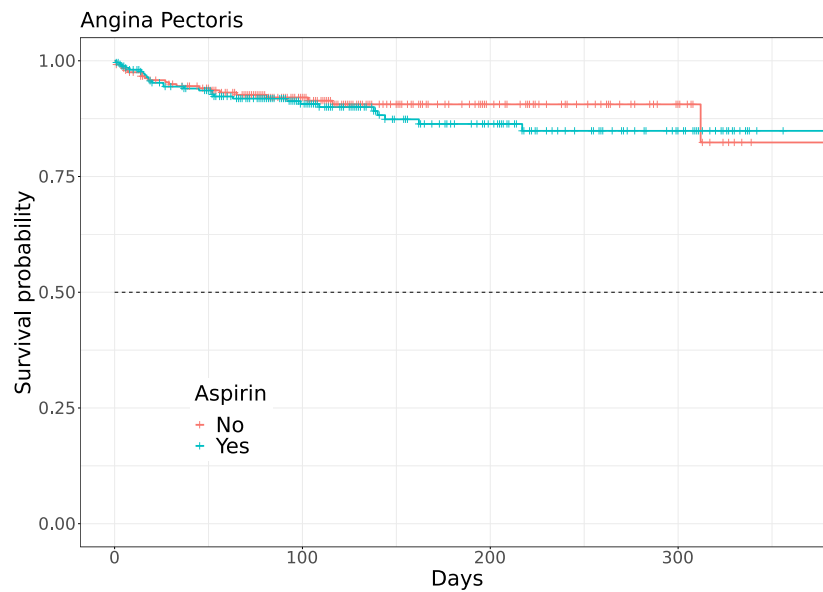

(b)

**Figure S1: Aspirin: Angina pectoris.**(a) Ordinal Logistic Regression Analysis. Y axis: number of individuals in the indicated category. See Table S5. (b). Kaplan Meier Curve. See Table S26 for corresponding Cox multiple regression analysis.

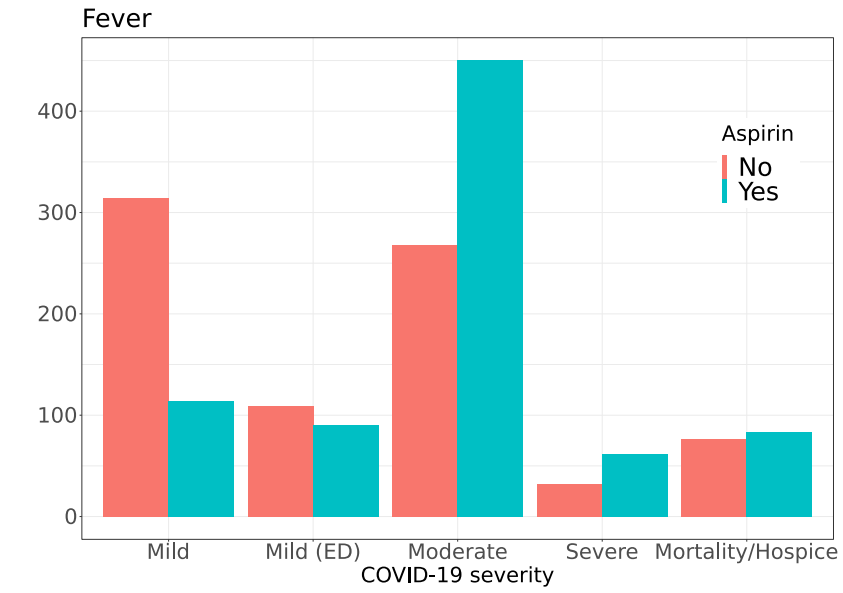

(a)

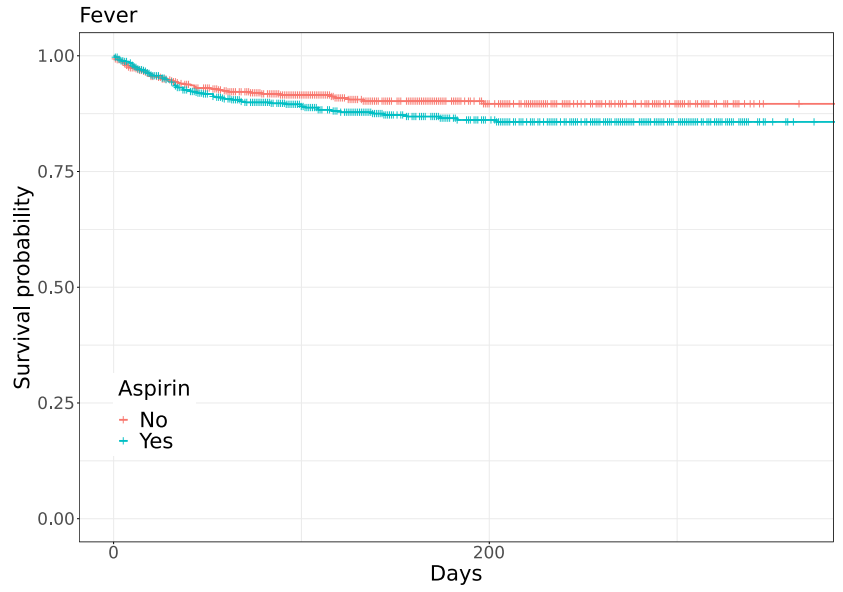

(b)

**Figure S2: Aspirin: Fever.**(a) Ordinal Logistic Regression Analysis. Y axis: number of individuals in the indicated category. See Table S6. (b). Kaplan Meier Curve. See Table S27 for corresponding Cox multiple regression analysis.

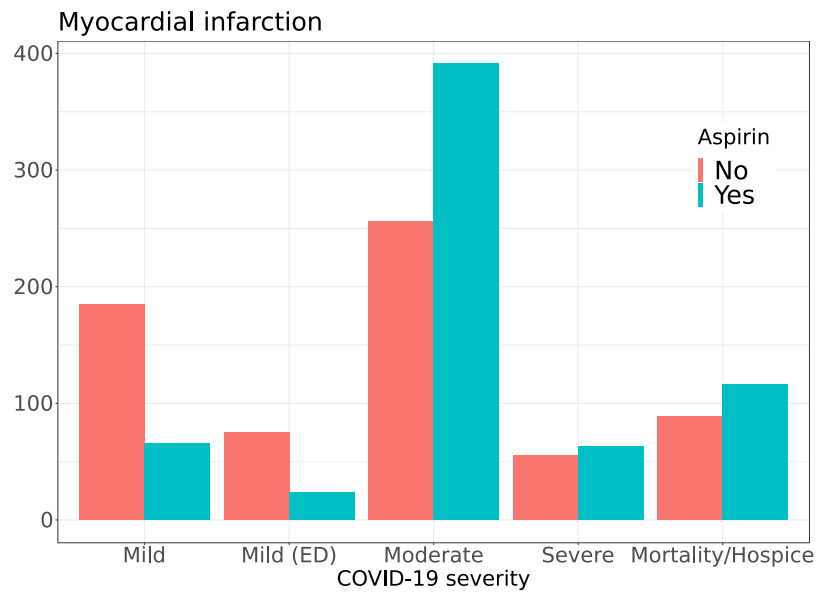

(a)

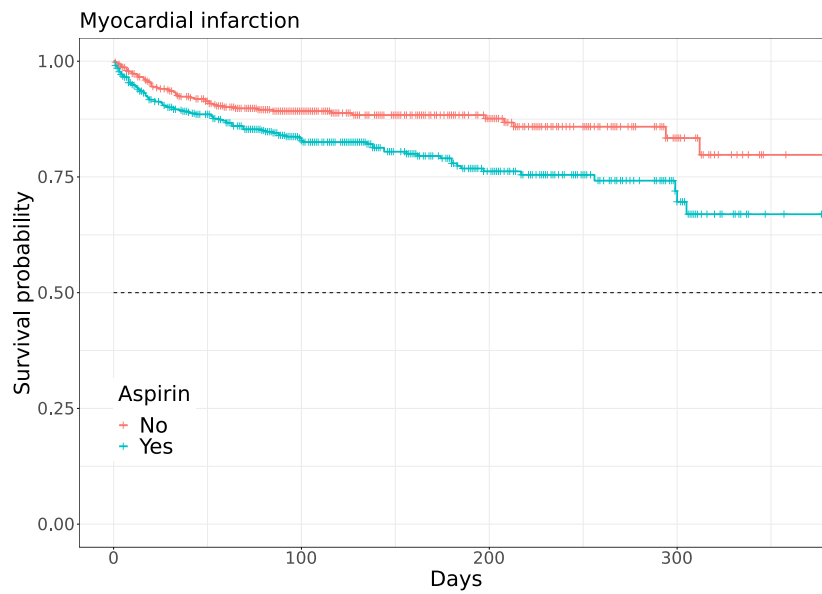

(b)

**Figure S3: Aspirin: Myocardial infarction.**(a) Ordinal Logistic Regression Analysis. Y axis: number of individuals in the indicated category. See Table [S8](#). (b). Kaplan Meier Curve. See Table [S29](#) for corresponding Cox multiple regression analysis.

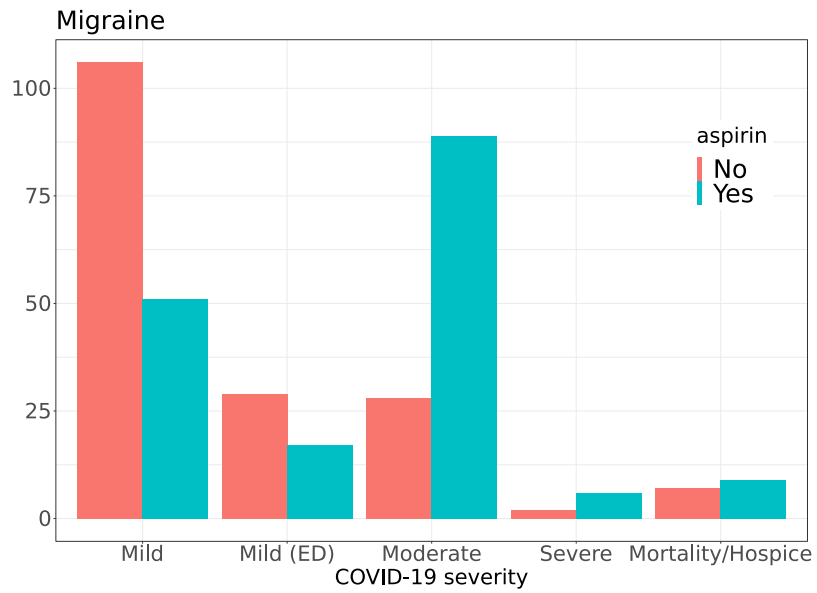

(a)

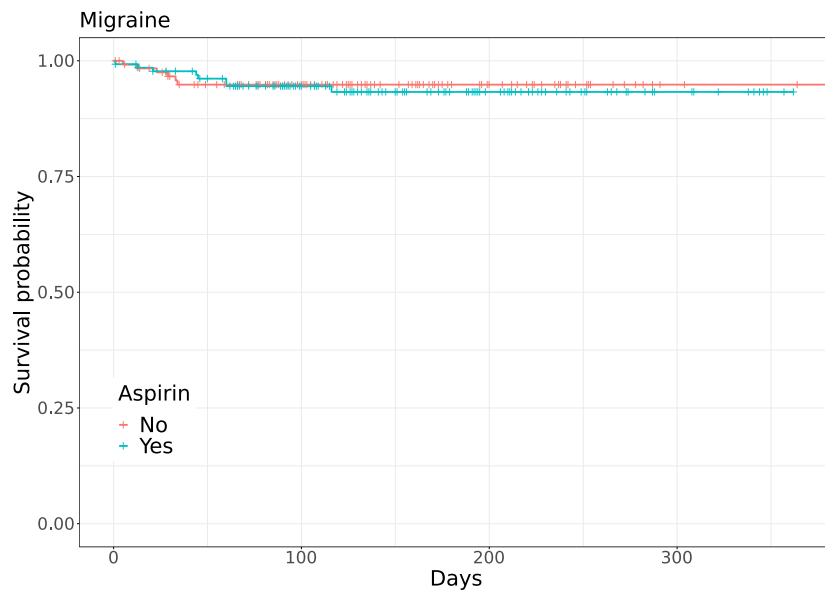

(b)

Figure S4: **Aspirin: Migraine.**(a) Ordinal Logistic Regression Analysis. Y axis: number of individuals in the indicated category. See Table S7. (b). Kaplan Meier Curve. See Table S28 for corresponding Cox multiple regression analysis.

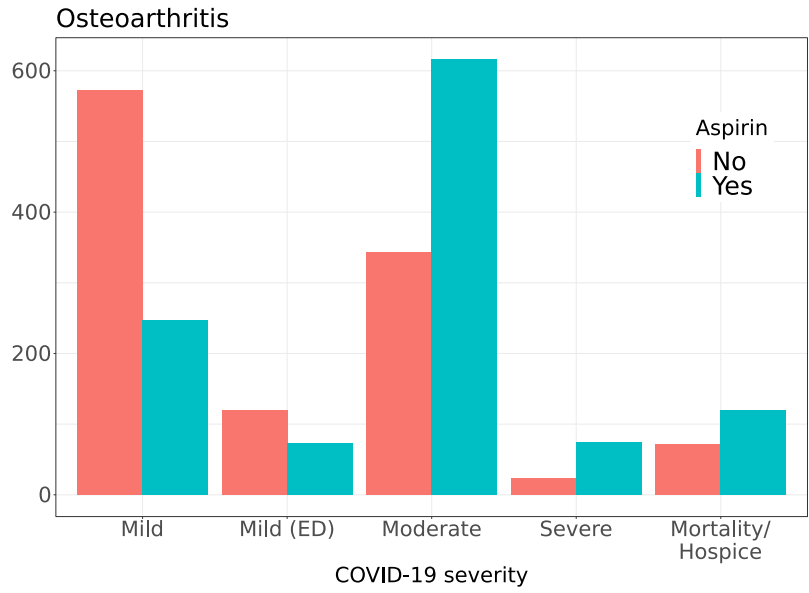

(a)

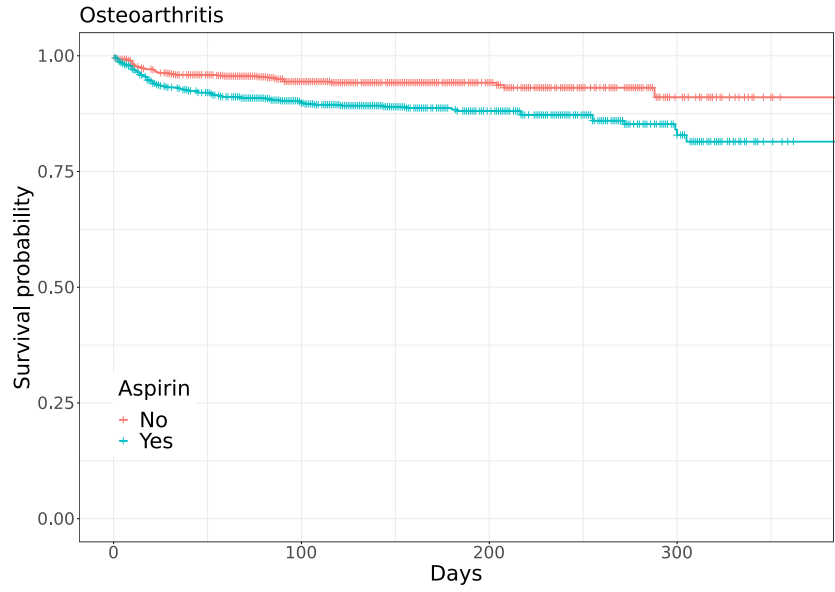

(b)

Figure S5: **Aspirin: Osteoarthritis.**(a) Ordinal Logistic Regression Analysis. Y axis: number of individuals in the indicated category. See Table S9. (b). Kaplan Meier Curve. See Table S30 for corresponding Cox multiple regression analysis.

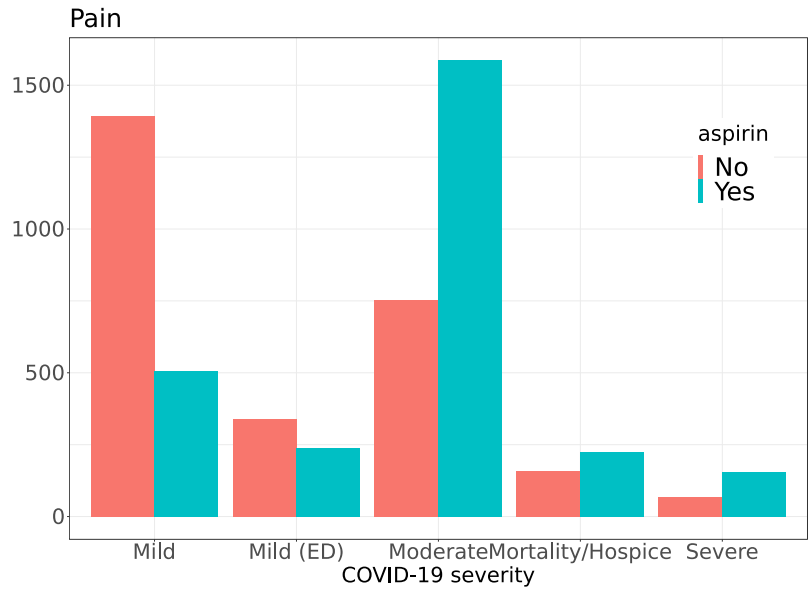

(a)

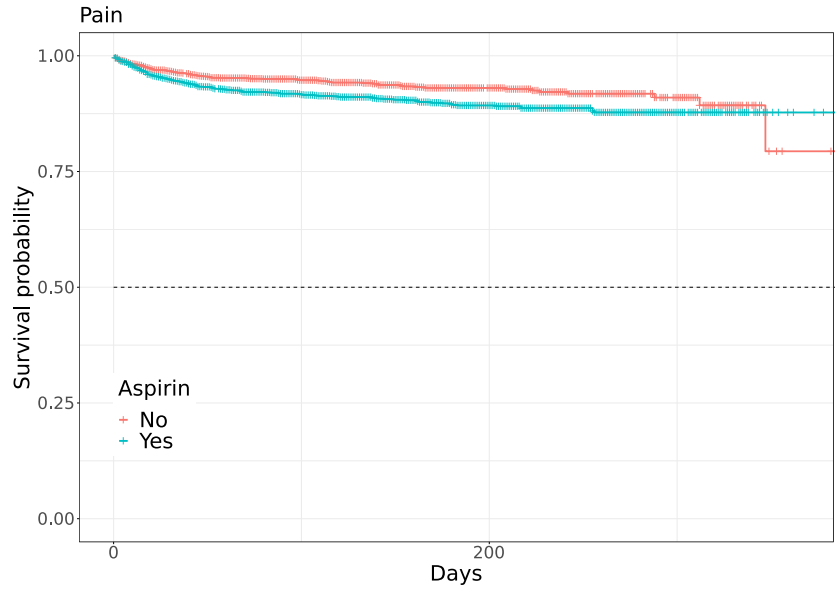

(b)

**Figure S6: Aspirin: Pain.**(a) Ordinal Logistic Regression Analysis. Y axis: number of individuals in the indicated category. See Table S10. (b). Kaplan Meier Curve. See Table S31 for corresponding Cox multiple regression analysis.

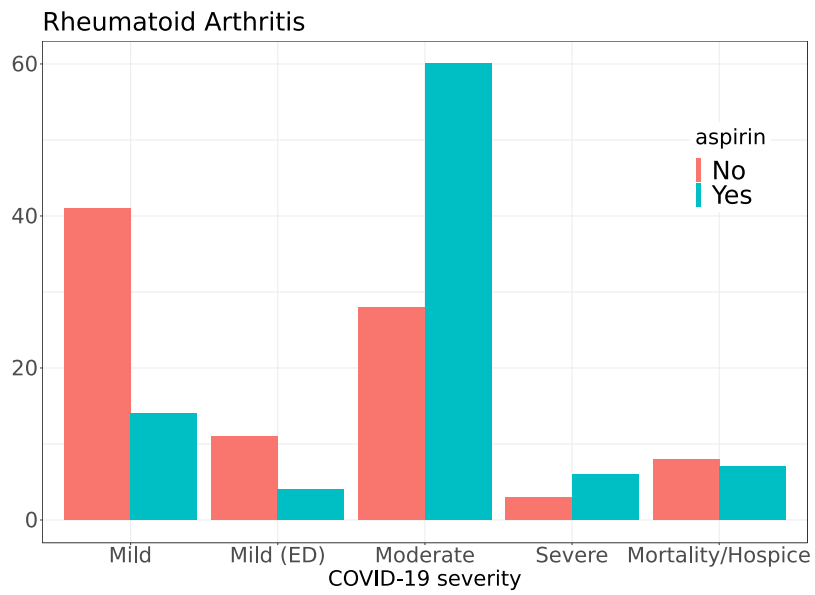

(a)

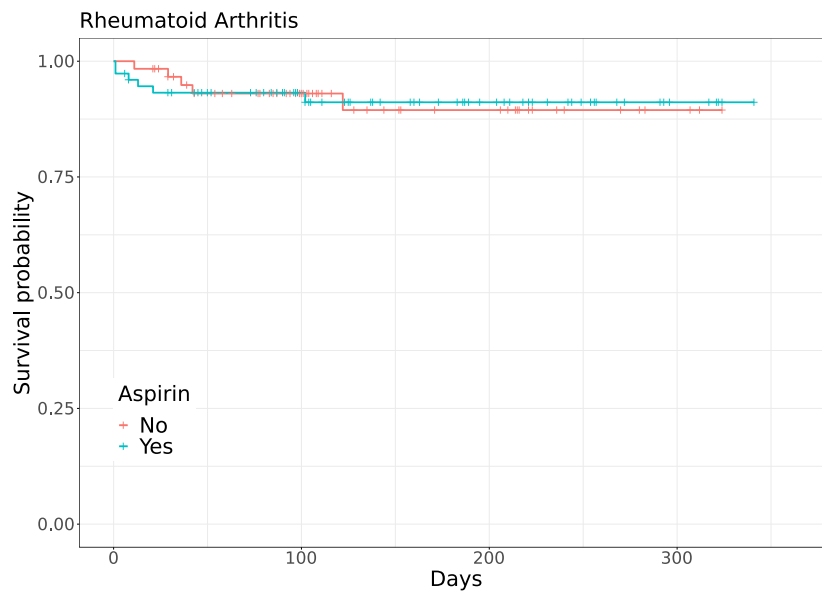

(b)

**Figure S7: Aspirin: Rheumatoid arthritis.** (a) Ordinal Logistic Regression Analysis. Y axis: number of individuals in the indicated category. See Table S11. (b). Kaplan Meier Curve. See Table S32 for corresponding Cox multiple regression analysis.

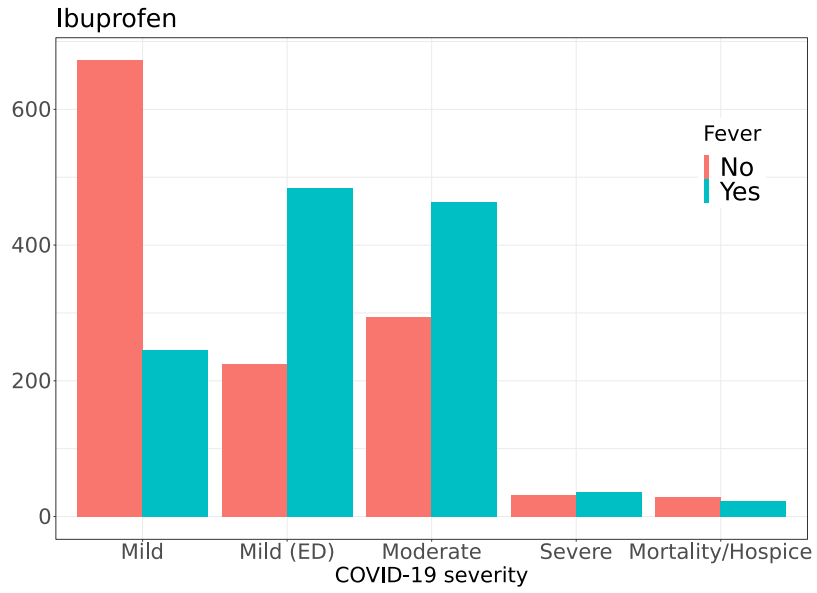

(a)

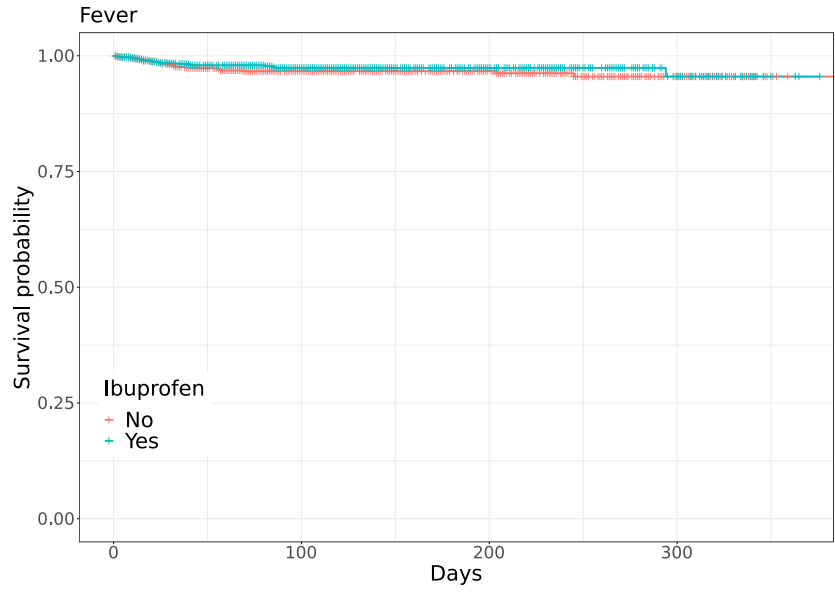

(b)

**Figure S8: Ibuprofen: Fever.**(a) Ordinal Logistic Regression Analysis. Y axis: number of individuals in the indicated category. See Table **S12**. (b). Kaplan Meier Curve. See Table **S33** for corresponding Cox multiple regression analysis.



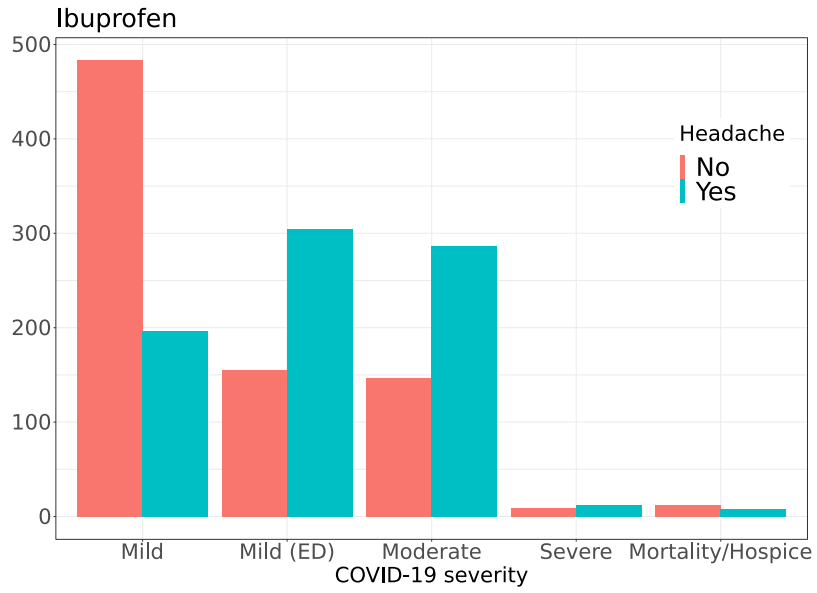

(a)

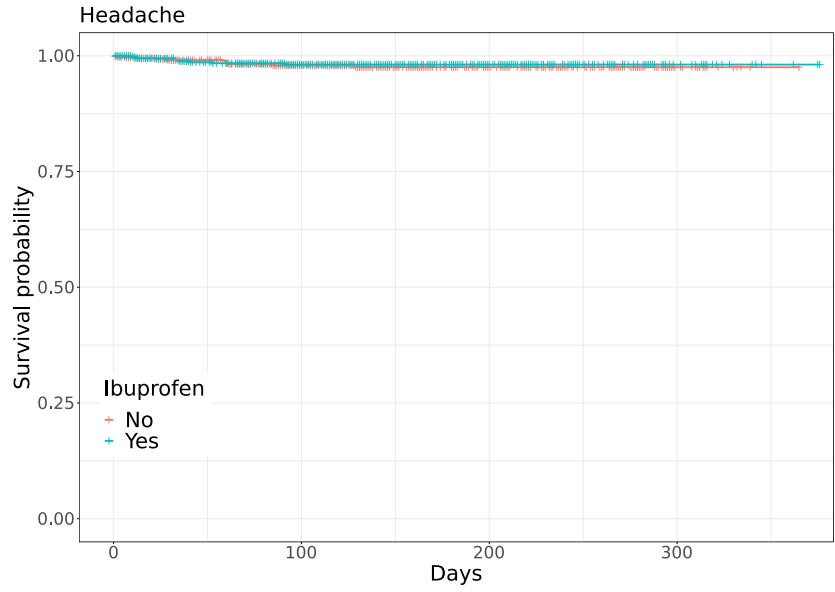

(b)

Figure S9: **Ibuprofen: Headache.**(a) Ordinal Logistic Regression Analysis. Y axis: number of individuals in the indicated category. See Table S13. (b). Kaplan Meier Curve. See Table S34 for corresponding Cox multiple regression analysis.

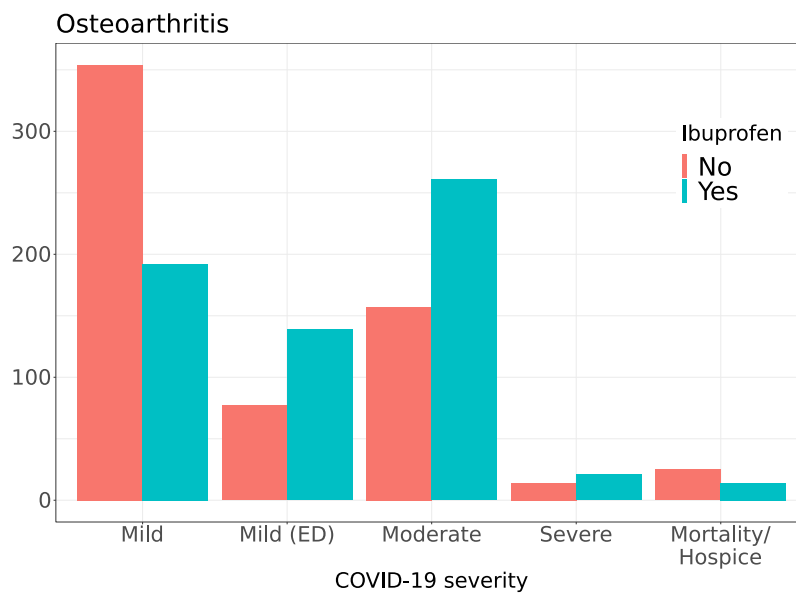

(a)

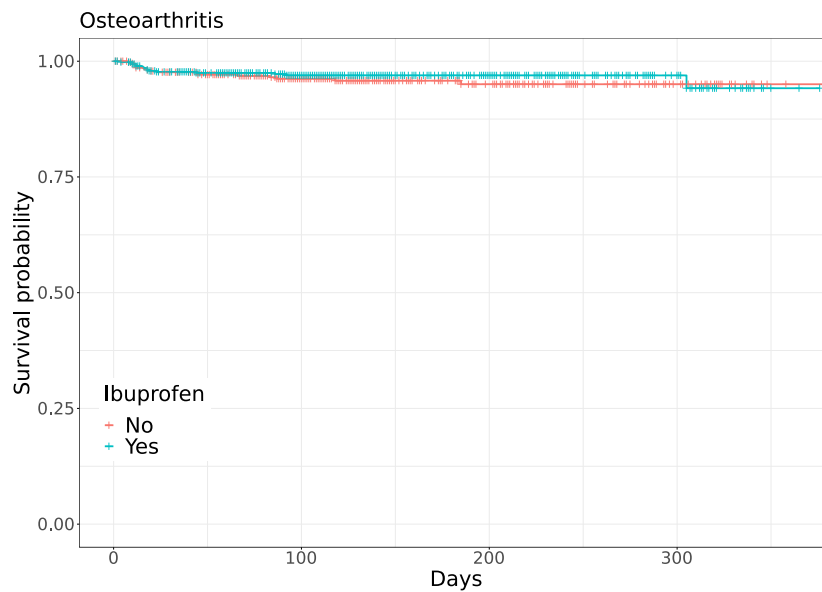

(b)

**Figure S10: Ibuprofen: Osteoarthritis.**(a) Ordinal Logistic Regression Analysis. Y axis: number of individuals in the indicated category. See Table S14. (b). Kaplan Meier Curve. See Table S35 for corresponding Cox multiple regression analysis.

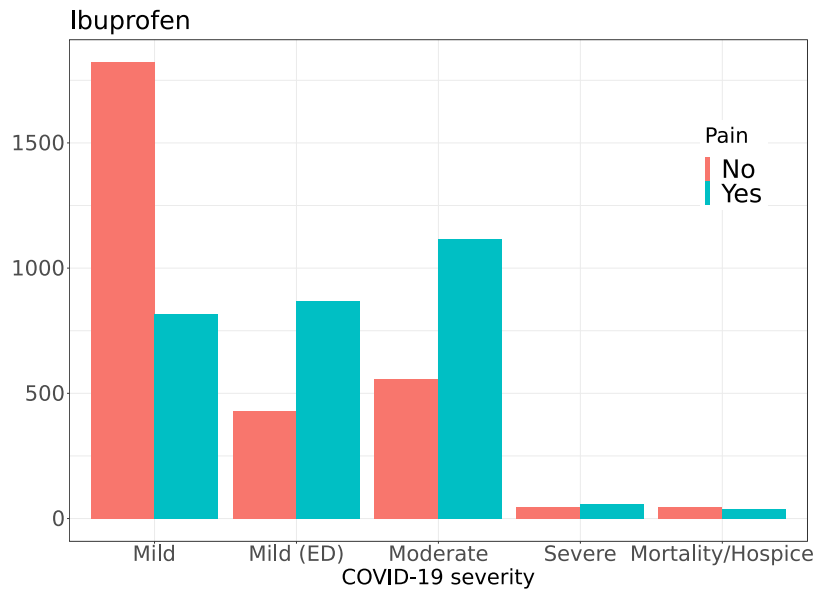

(a)

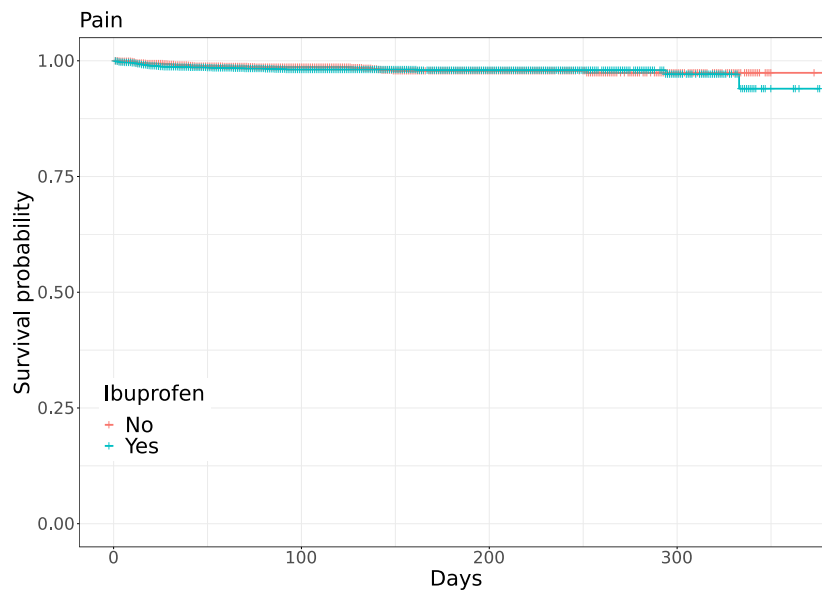

(b)

**Figure S11: Ibuprofen: Pain.**(a) Ordinal Logistic Regression Analysis. Y axis: number of individuals in the indicated category. See Table S15. (b). Kaplan Meier Curve. See Table S36 for corresponding Cox multiple regression analysis.

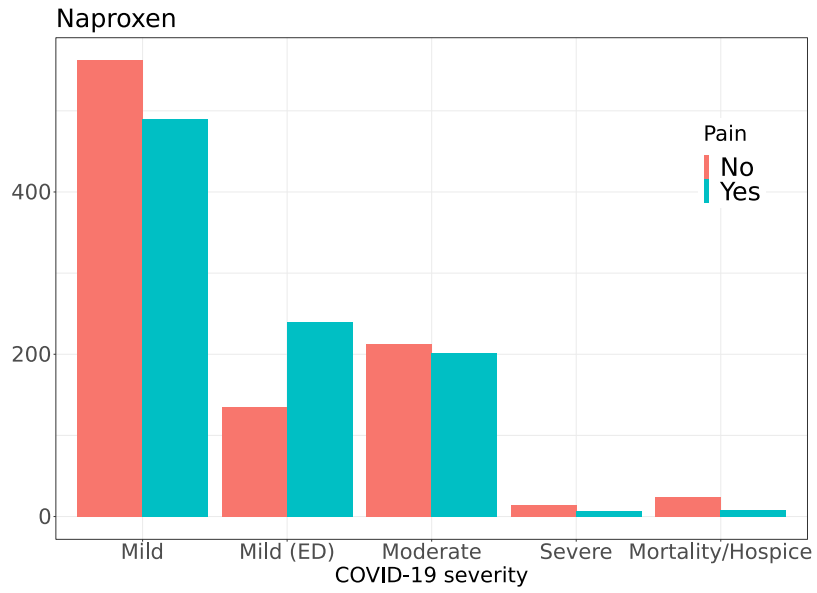

(a)

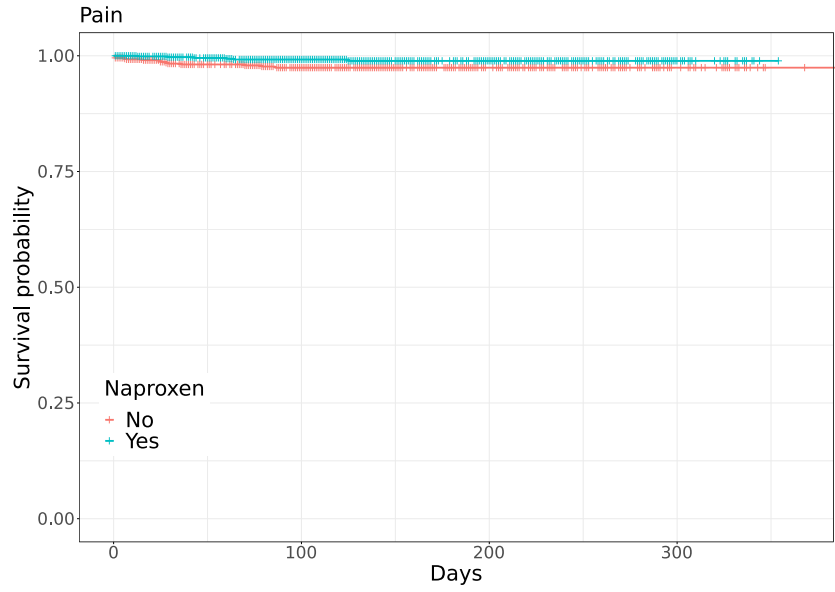

(b)

Figure S12: **Naproxen: Pain.**(a) Ordinal Logistic Regression Analysis. Y axis: number of individuals in the indicated category. See Table S16. (b). Kaplan Meier Curve. See Table S37 for corresponding Cox multiple regression analysis.

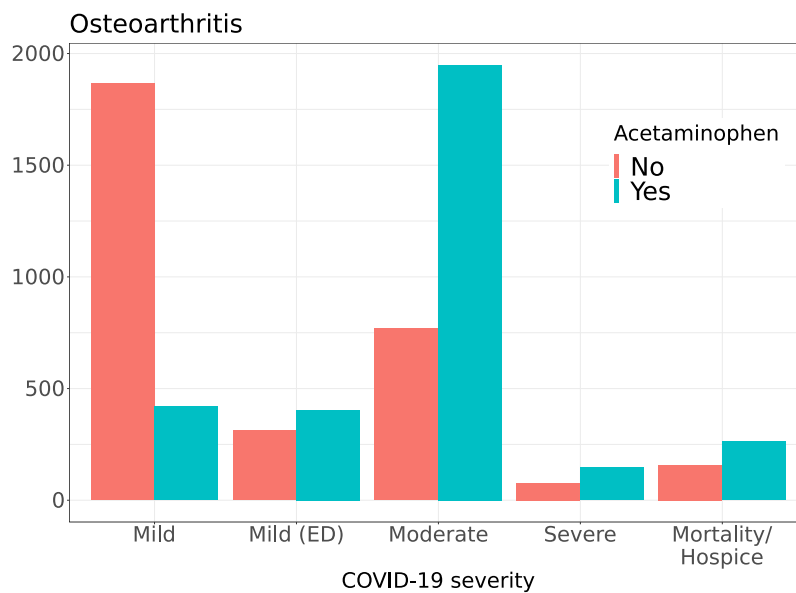

(a)

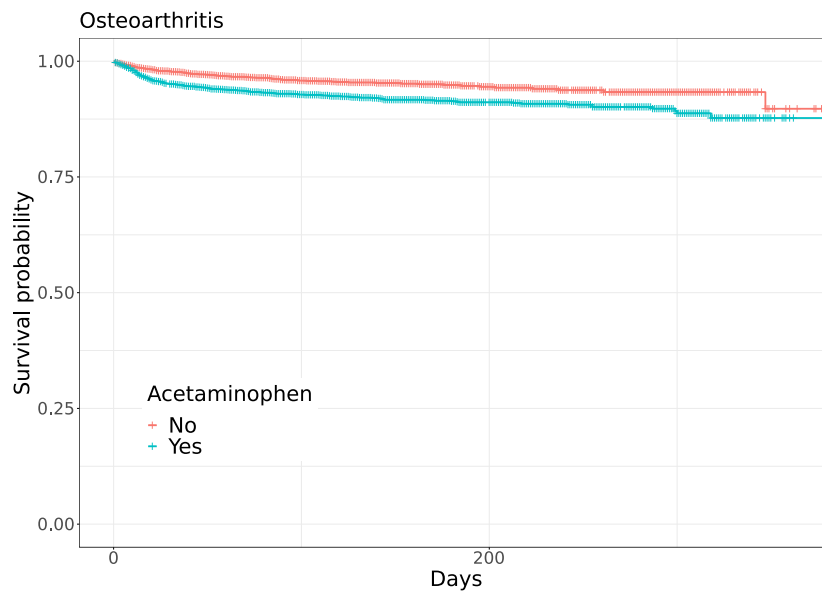

(b)

Figure S13: **Acetaminophen: Osteoarthritis.**(a) Ordinal Logistic Regression Analysis. Y axis: number of individuals in the indicated category. See Table S17. (b). Kaplan Meier Curve. See Table S38 for corresponding Cox multiple regression analysis.

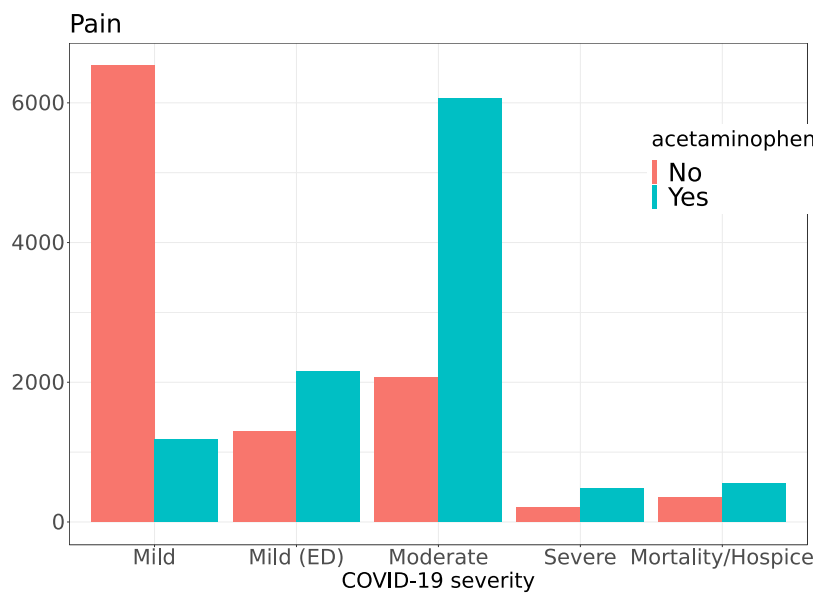

(a)

Figure S14: Acetaminophen: Pain.(a) Ordinal Logistic Regression Analysis. Y axis: number of individuals in the indicated category. See Table S18.

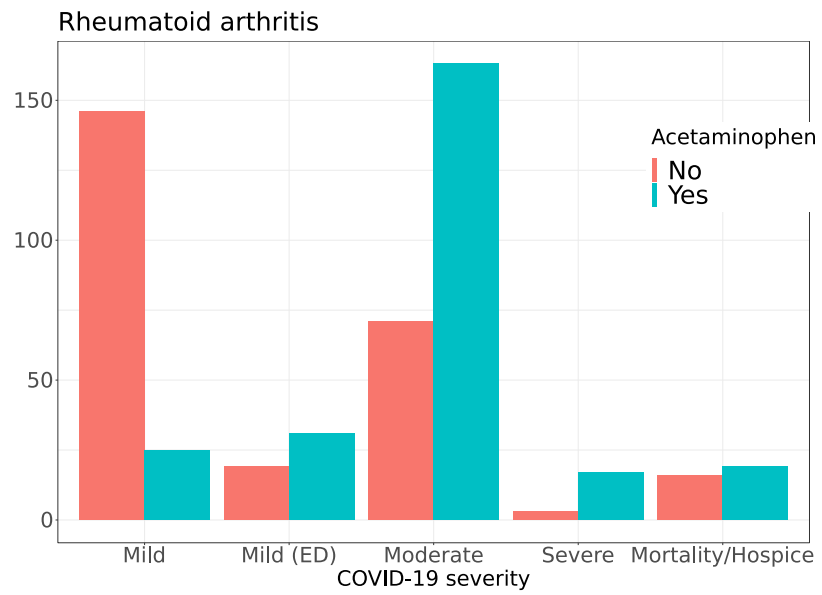

(a)

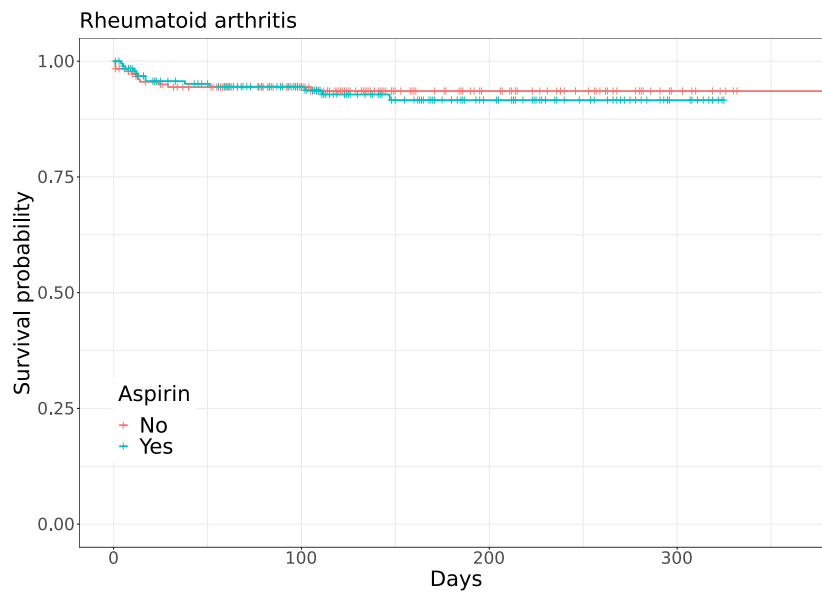

(b)

**Figure S15: Acetaminophen: Rheumatoid arthritis.**(a) Ordinal Logistic Regression Analysis. Y axis: number of individuals in the indicated category. See Table S19. (b). Kaplan Meier Curve. See Table S40 for corresponding Cox multiple regression analysis.

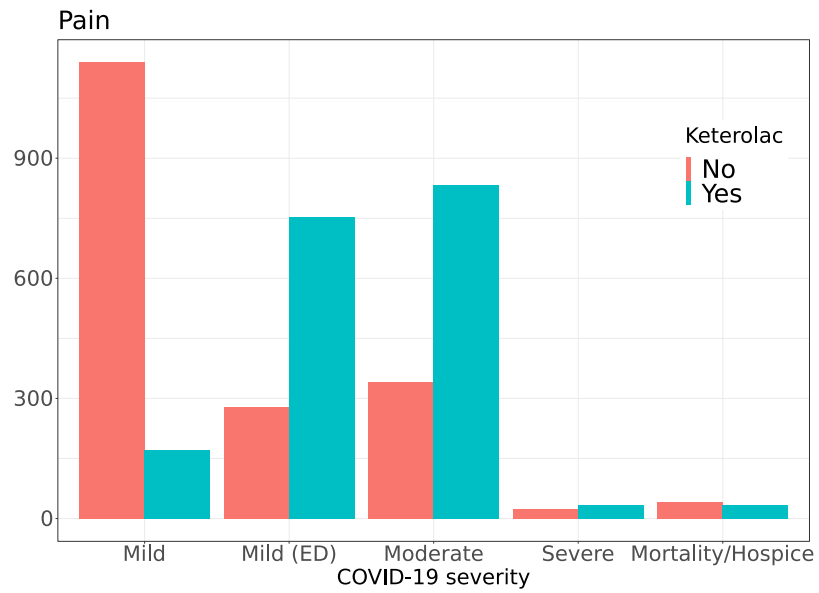

(a)

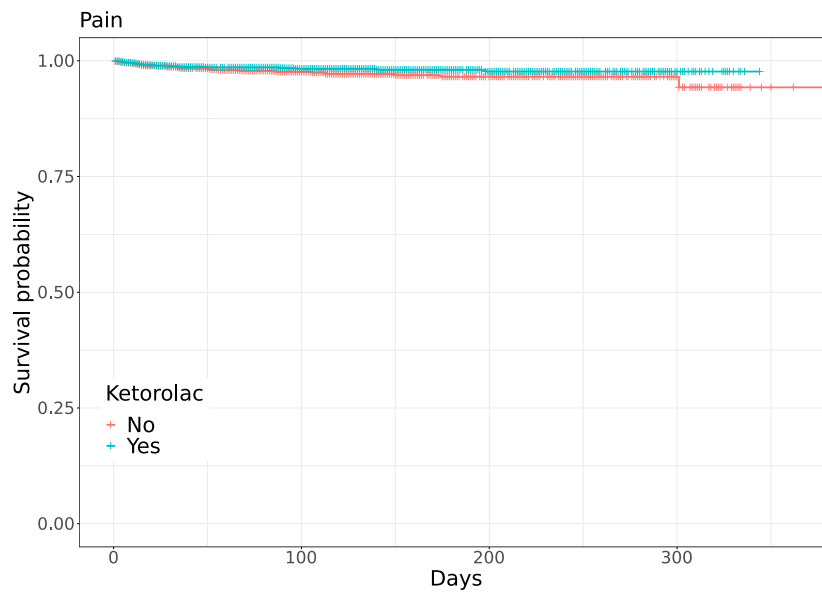

(b)

**Figure S16: Ketorolac: Pain.**(a) Ordinal Logistic Regression Analysis. Y axis: number of individuals in the indicated category. See Table S20. (b). Kaplan Meier Curve. See Table S41 for corresponding Cox multiple regression analysis.



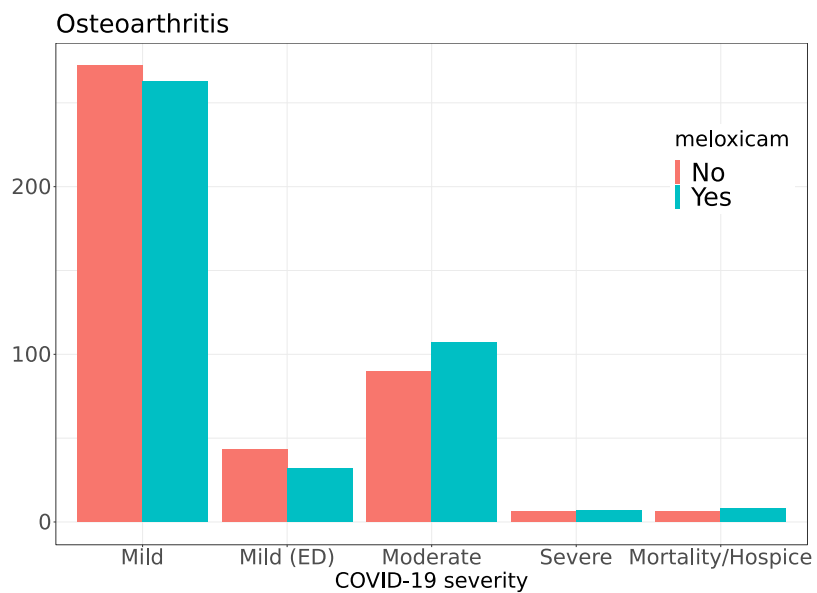

(a)

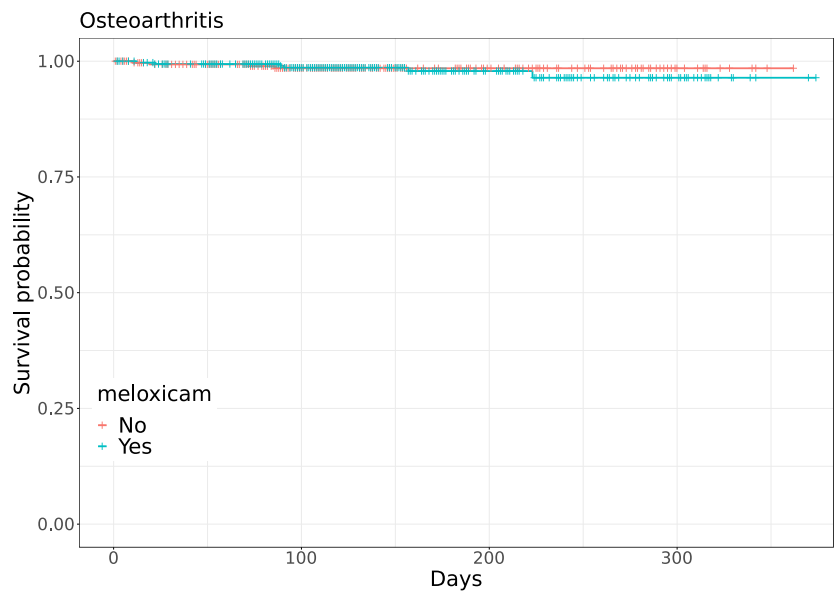

(b)

**Figure S17: Meloxicam: Osteoarthritis.**(a) Ordinal Logistic Regression Analysis. Y axis: number of individuals in the indicated category. See Table S21. (b). Kaplan Meier Curve. See Table S42 for corresponding Cox multiple regression analysis.

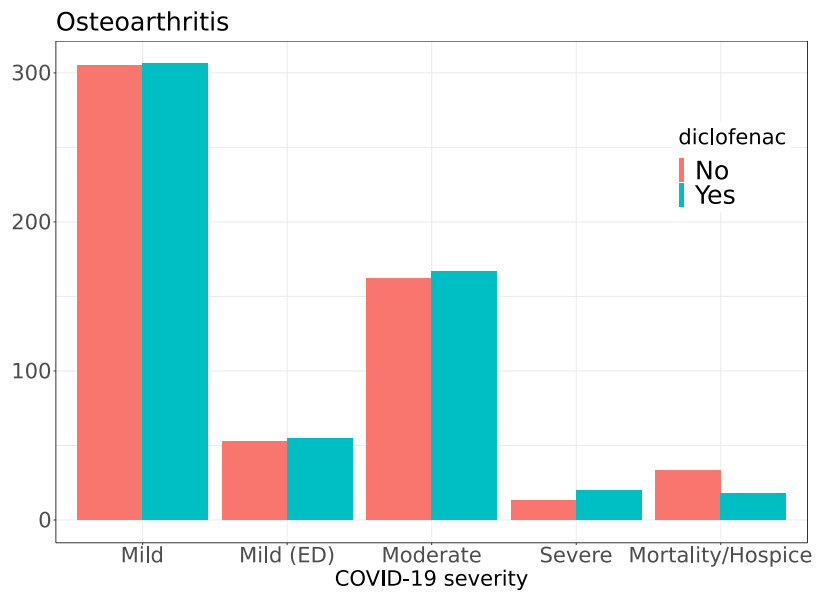

(a)

Figure S18: **Diclofenac: Osteoarthritis.**(a) Ordinal Logistic Regression Analysis. Y axis: number of individuals in the indicated category. See Table S22.

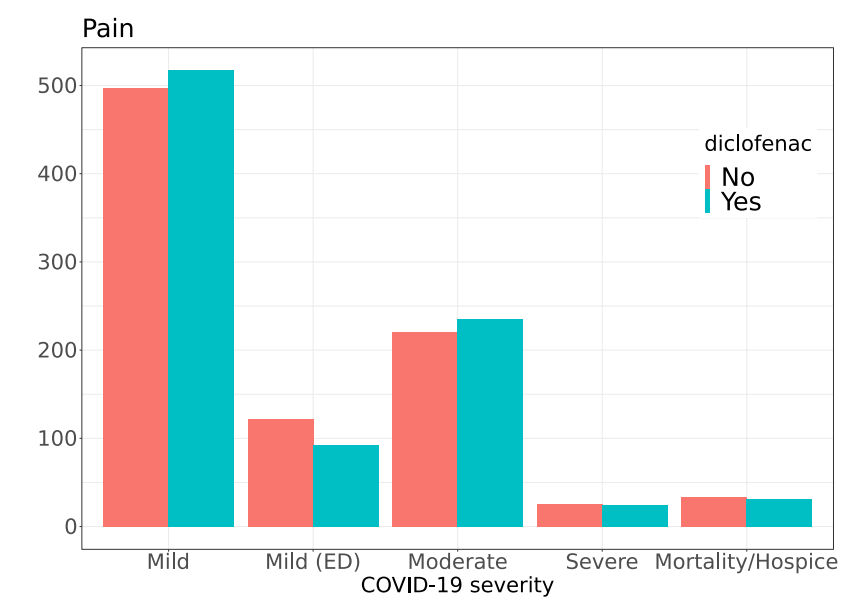

(a)

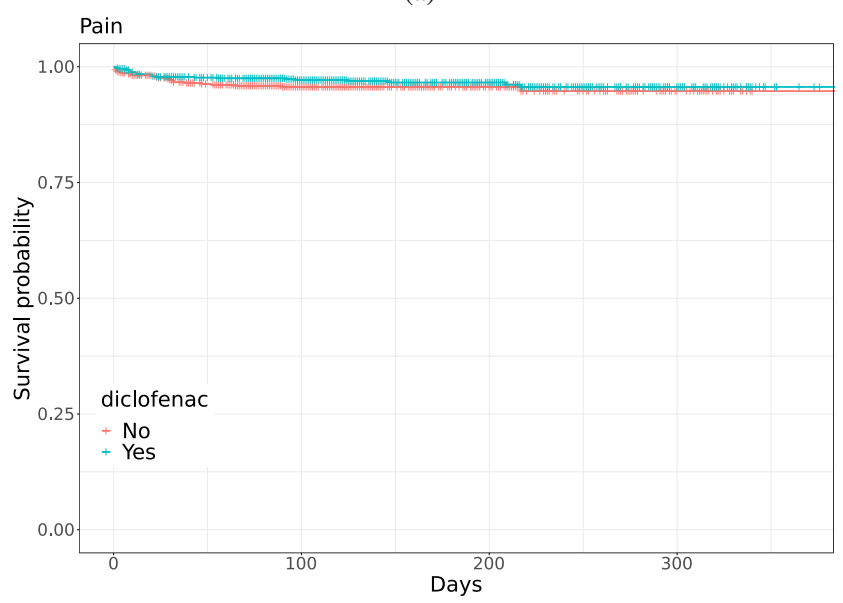

(b)

**Figure S19: Diclofenac: Pain.**(a) Ordinal Logistic Regression Analysis. Y axis: number of individuals in the indicated category. See Table S23. (b). Kaplan Meier Curve. See Table S44 for corresponding Cox multiple regression analysis.

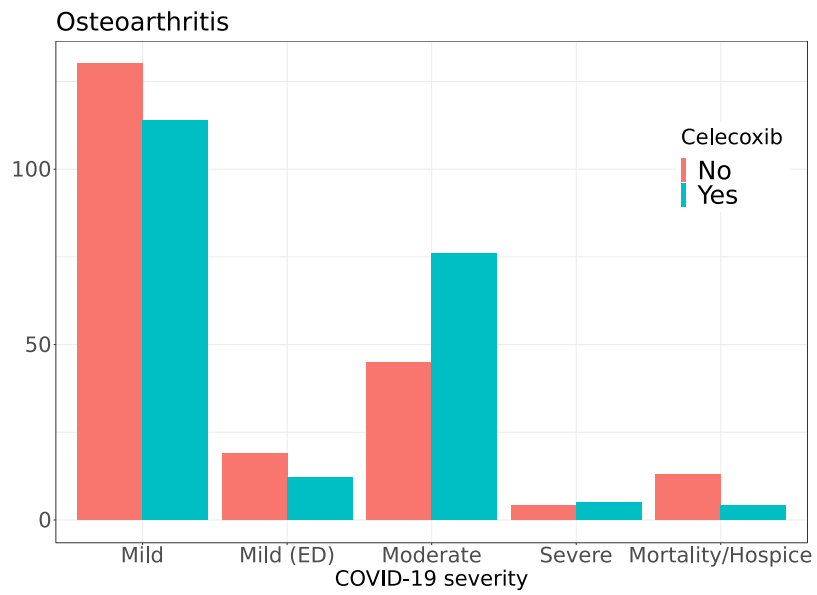

(a)

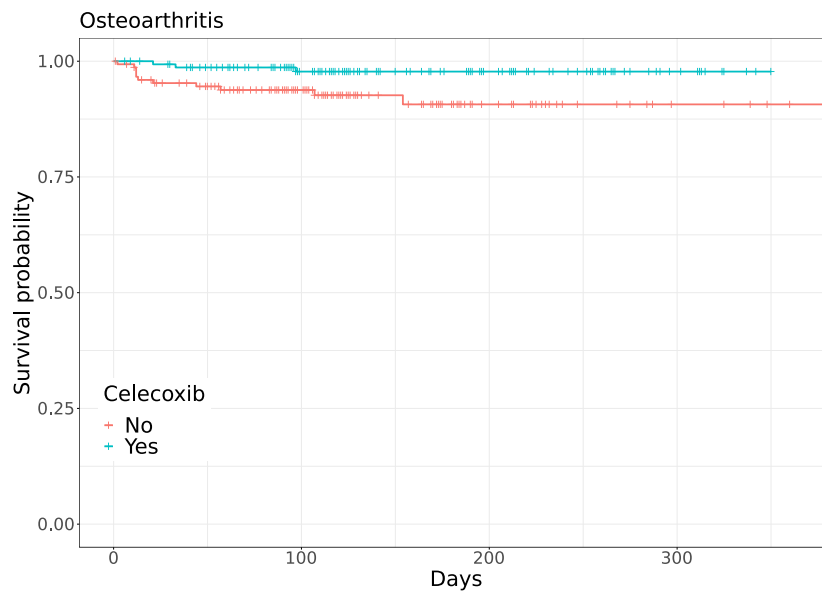

(b)

**Figure S20: Celecoxib: Osteoarthritis.**(a) Ordinal Logistic Regression Analysis. Y axis: number of individuals in the indicated category. See Table S24. (b). Kaplan Meier Curve. See Table S45 for corresponding Cox multiple regression analysis.

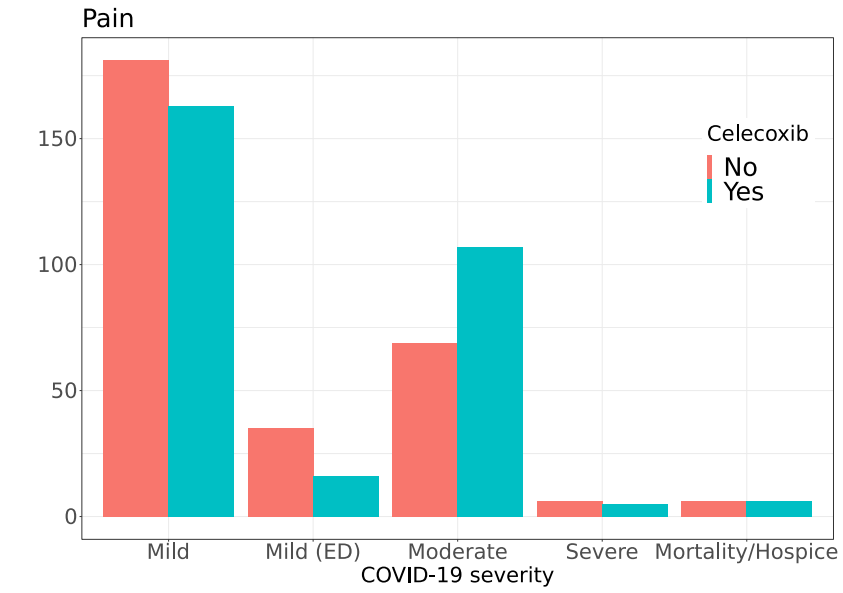

(a)

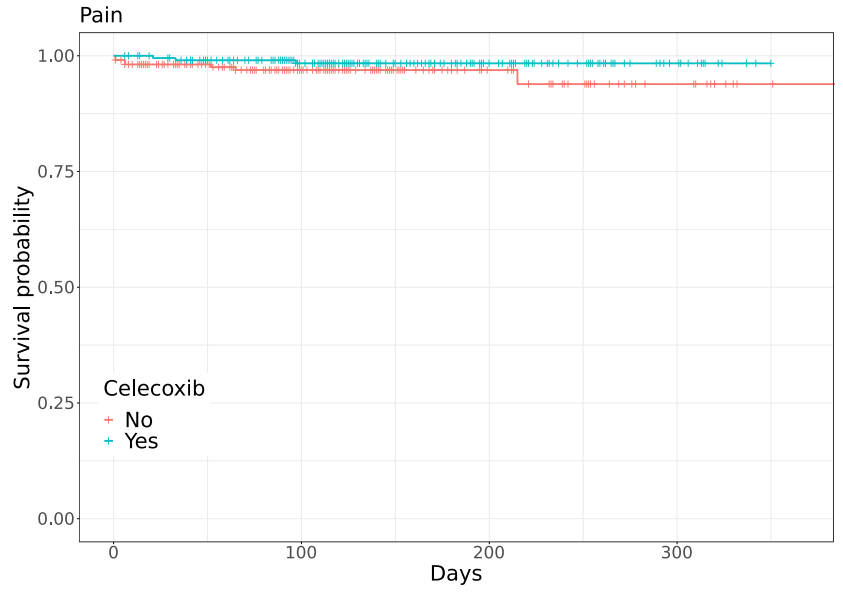

(b)

Figure S21: **Celecoxib: Pain.**(a) Ordinal Logistic Regression Analysis. Y axis: number of individuals in the indicated category. See Table S25. (b). Kaplan Meier Curve. See Table S46 for corresponding Cox multiple regression analysis.

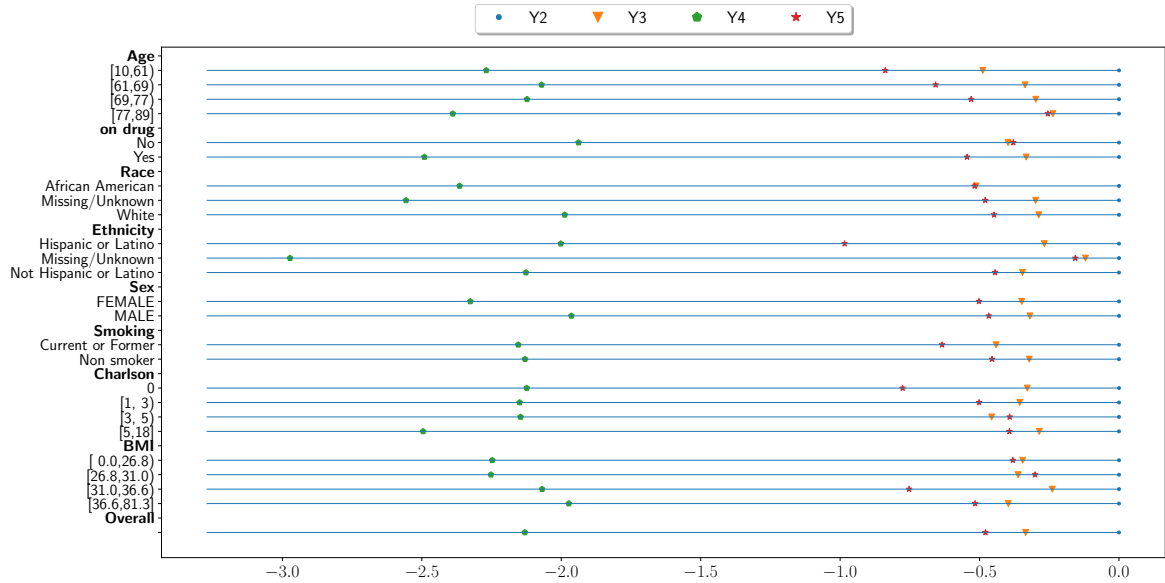

**Figure S22: Assessment of proportional odds assumption.** We assessed the proportional odds assumption of the ordinal logistic regression (OLR) of the Aspirin–Osteoarthritis data. OLR was performed to predict COVID-19 severity as a function of age, race, ethnicity, gender, smoking status, Charlson Comorbidity Index, and BMI for osteoarthritis cohort either taking aspirin or not (“on drug”). The figure shows predictions from a logit model, used to model the probability that  $y$  is greater than or equal to a given value (for each level of  $y$ ), using one predictor variable at a time. The values represent the (linear) predicted values that would result if the dependent variable is regressed on the predictor variables one at a time, without the parallel slopes assumption. The levels represent the COVID-19 severity levels (“mild”, “mild ED”, “moderate”, “severe”, “dead”). Y2: the first set of coefficients to be zero so there is a common reference point. Y3: difference between coefficients for “moderate” and for “mild ED”; Y4: difference between coefficients for “severe” and for “moderate”; Y5: difference between coefficients for “dead” and for “severe”. Each of the quantities is plotted with respect to zero, i.e., they are not “stacked”. The plot was generated with a Python matplotlib script from the coefficients generated from an ordinal logistic regression produced with the polr function from the MASS R package.

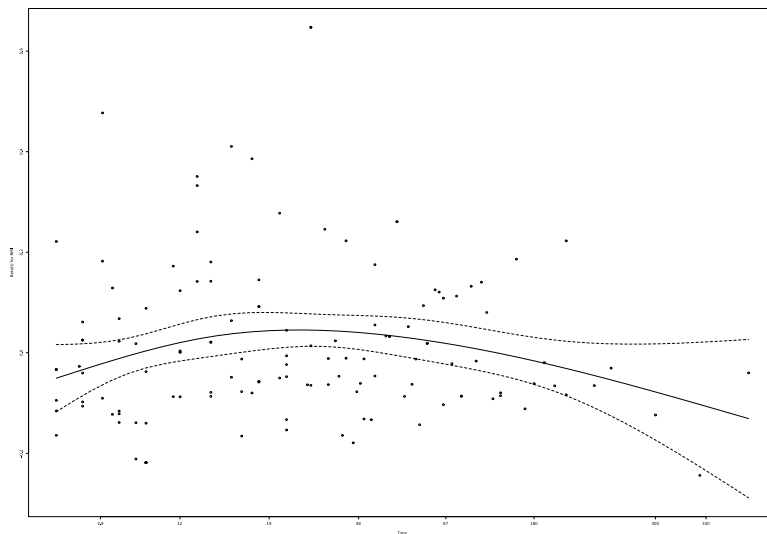

**Figure S23: Schoenfeld residuals from Kaplan-Meier survival analysis of a subcohort of Aspirin/osteoarthritis patients.** The analysis corresponds to Figure 2A of the main manuscript. Analysis was performed using the `cox.zph` function of the R `survival` package. P-values were as follows. Age  $p = 0.072$ , on drug  $p = 0.693$ , Race  $p = 0.673$ , ethnicity  $p = 0.463$ , gender  $p = 0.106$ , smoking  $p = 0.831$ , Charlson comoridity score  $p = 0.399$ , BMI  $p = 0.474$ , and global  $p = 0.486$ .

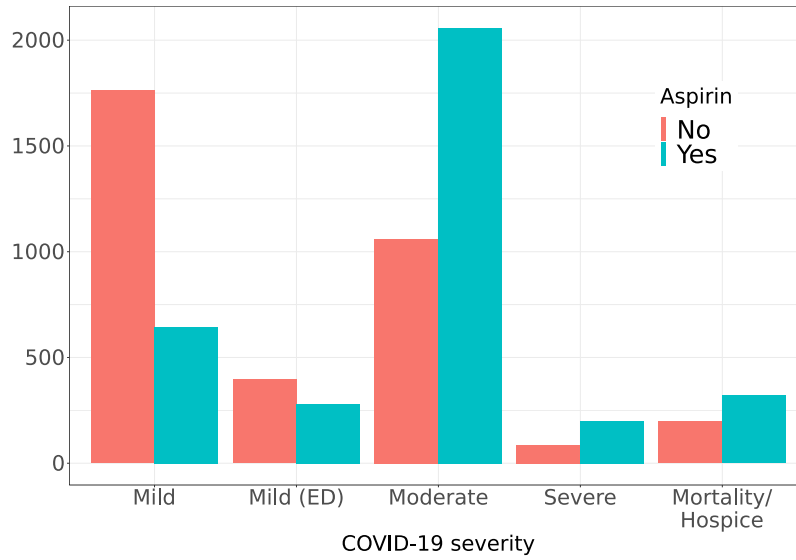

(a)

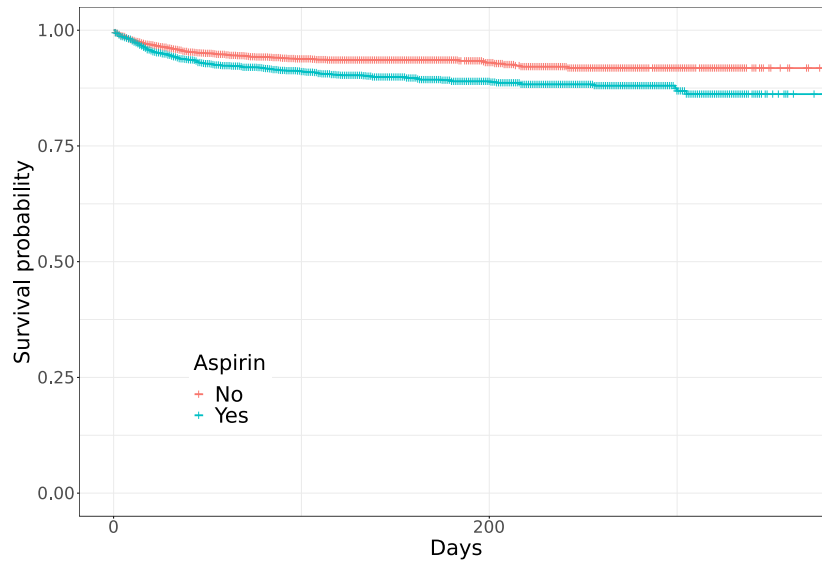

(b)

**Figure S24: Aspirin (entire subcohort).**(a) Ordinal Logistic Regression Analysis. Y axis: number of individuals in the indicated category. See Table S47. (b). Kaplan Meier Curve. See Table S55 for corresponding Cox multiple regression analysis.



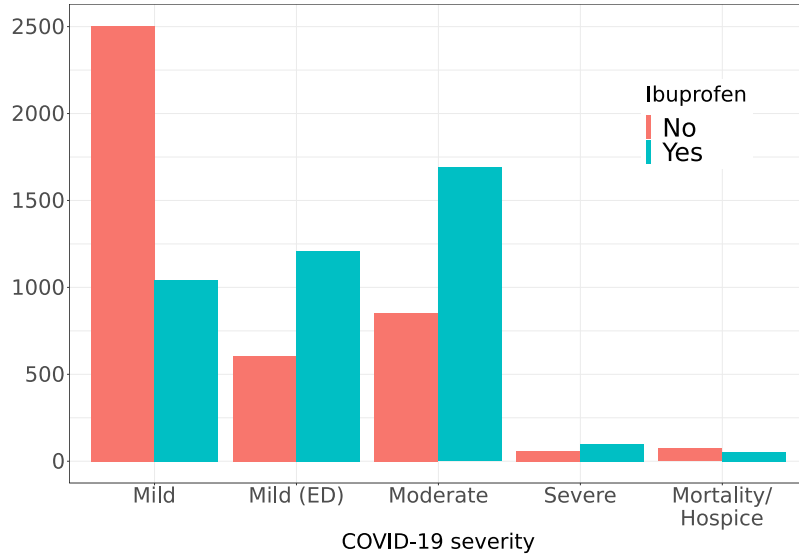

(a)

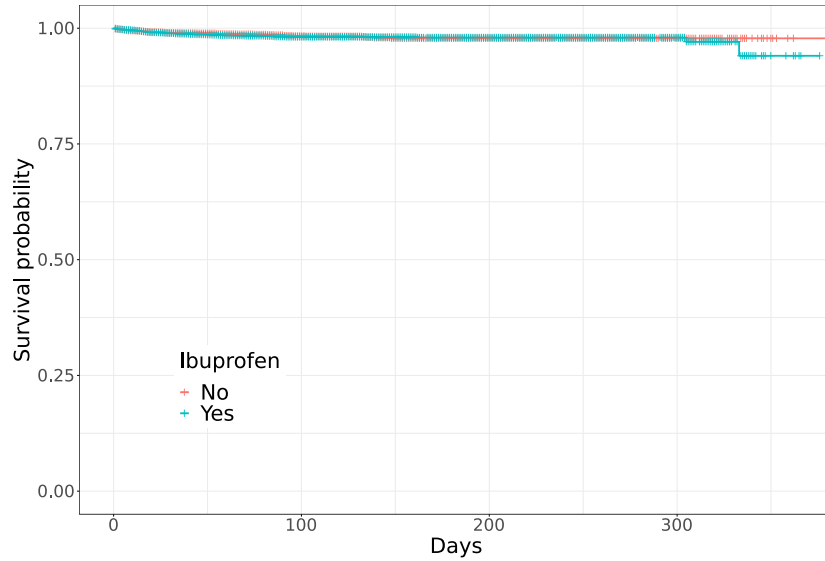

(b)

**Figure S25: Ibuprofen (entire subcohort).**(a) Ordinal Logistic Regression Analysis. Y axis: number of individuals in the indicated category. See Table S48. (b). Kaplan Meier Curve. See Table S56 for corresponding Cox multiple regression analysis.

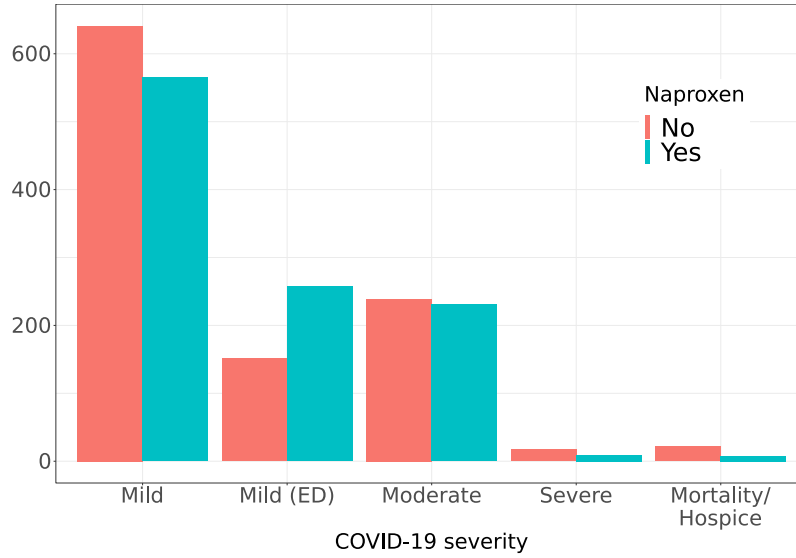

(a)

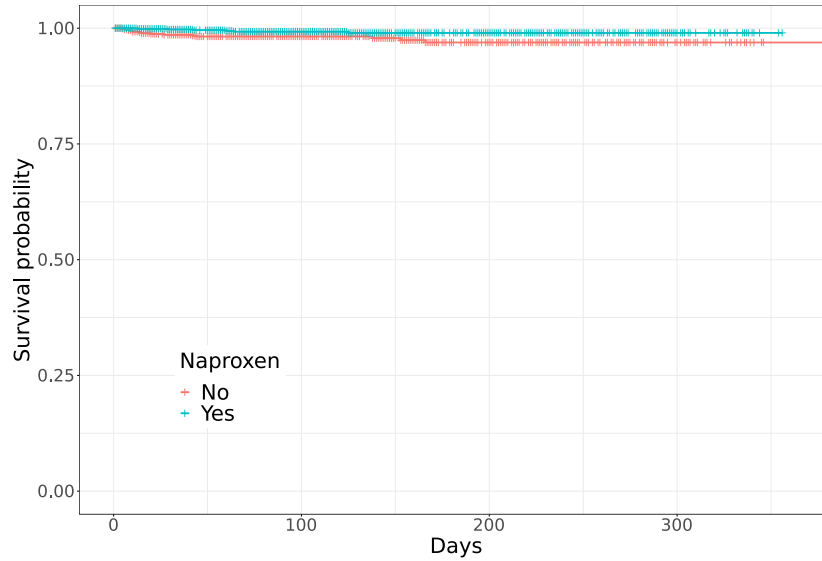

(b)

**Figure S26: Naproxen (entire subcohort).**(a) Ordinal Logistic Regression Analysis. Y axis: number of individuals in the indicated category. See Table S49. (b). Kaplan Meier Curve. See Table S57 for corresponding Cox multiple regression analysis.

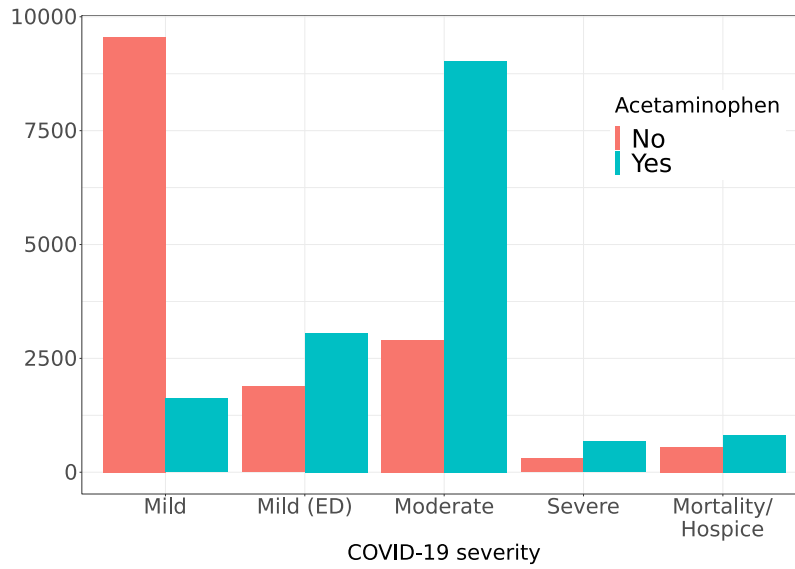

(a)

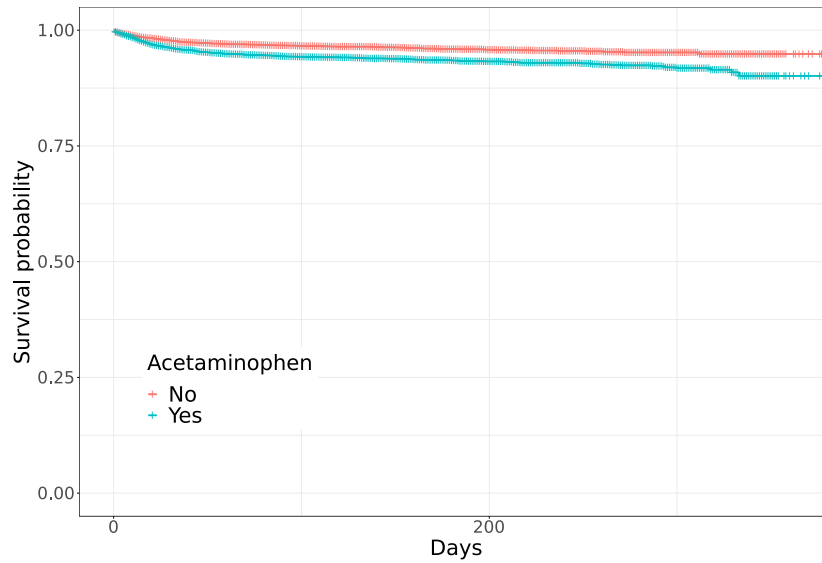

(b)

**Figure S27: Acetaminophen (entire subcohort).**(a) Ordinal Logistic Regression Analysis. Y axis: number of individuals in the indicated category. See Table [S50](#). (b). Kaplan Meier Curve. See Table [S58](#) for corresponding Cox multiple regression analysis.

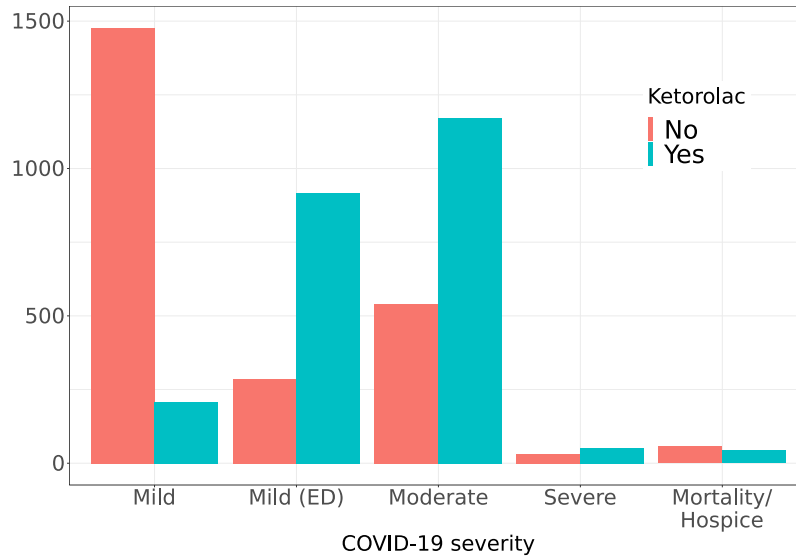

(a)

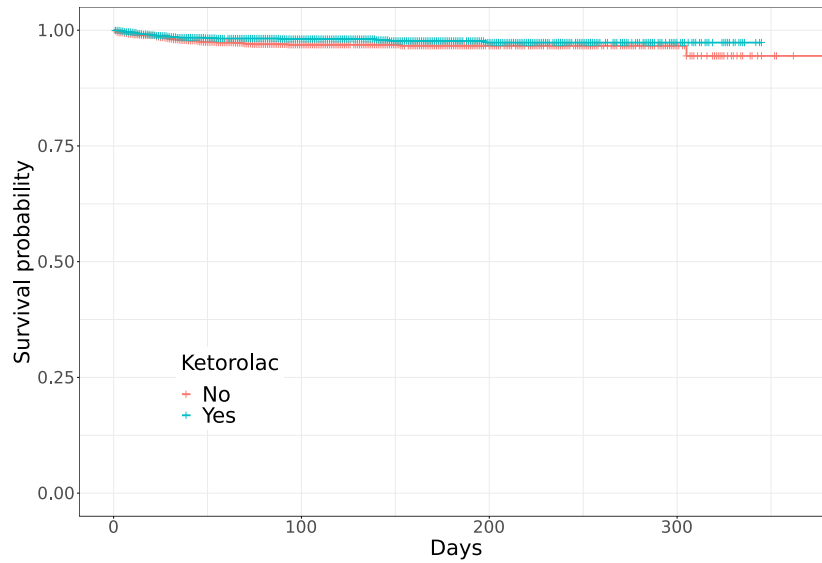

(b)

**Figure S28: Ketorolac (entire subcohort).** (a) Ordinal Logistic Regression Analysis. Y axis: number of individuals in the indicated category. See Table S51. (b). Kaplan Meier Curve. See Table S59 for corresponding Cox multiple regression analysis.

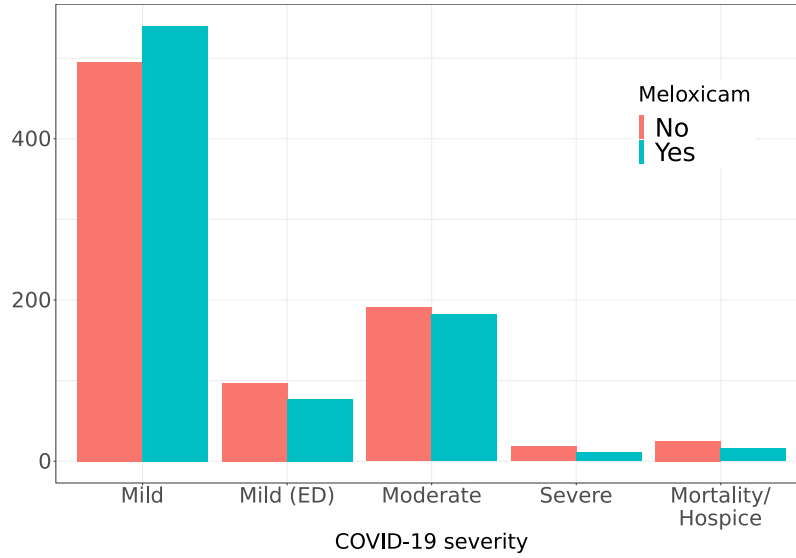

(a)

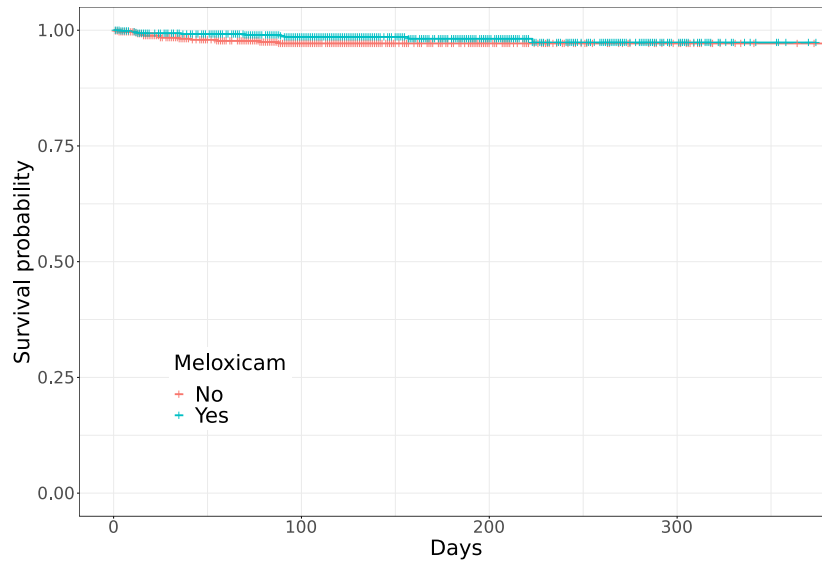

(b)

Figure S29: **Meloxicam (entire subcohort).**(a) Ordinal Logistic Regression Analysis. Y axis: number of individuals in the indicated category. See Table S52. (b). Kaplan Meier Curve. See Table S60 for corresponding Cox multiple regression analysis.

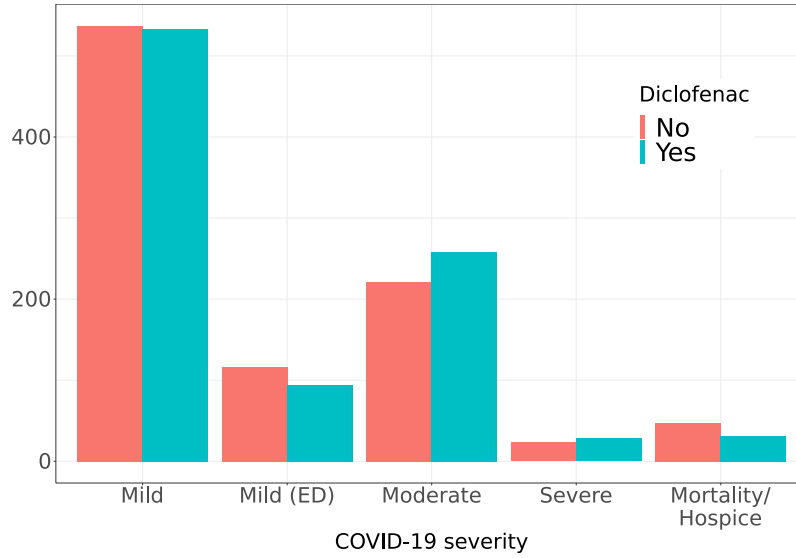

(a)

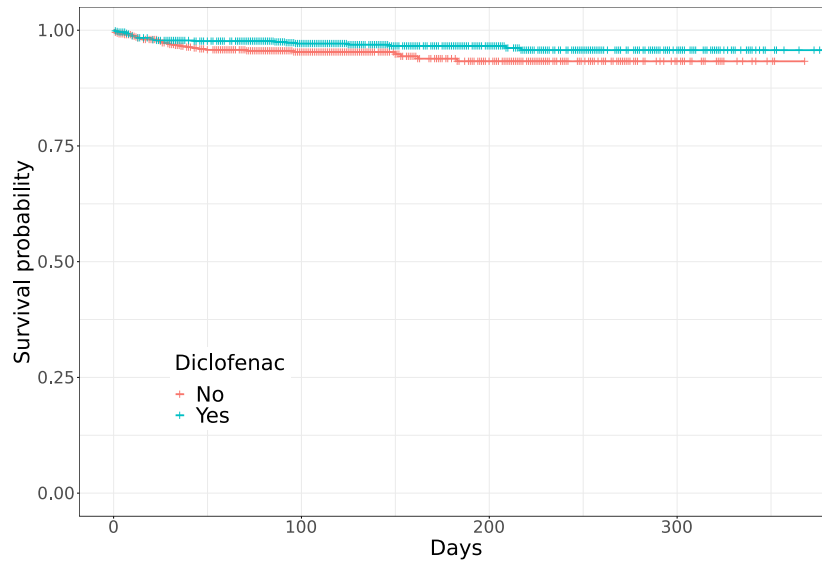

(b)

**Figure S30: Diclofenac (entire subcohort).** (a) Ordinal Logistic Regression Analysis. Y axis: number of individuals in the indicated category. See Table S53. (b). Kaplan Meier Curve. See Table S61 for corresponding Cox multiple regression analysis.

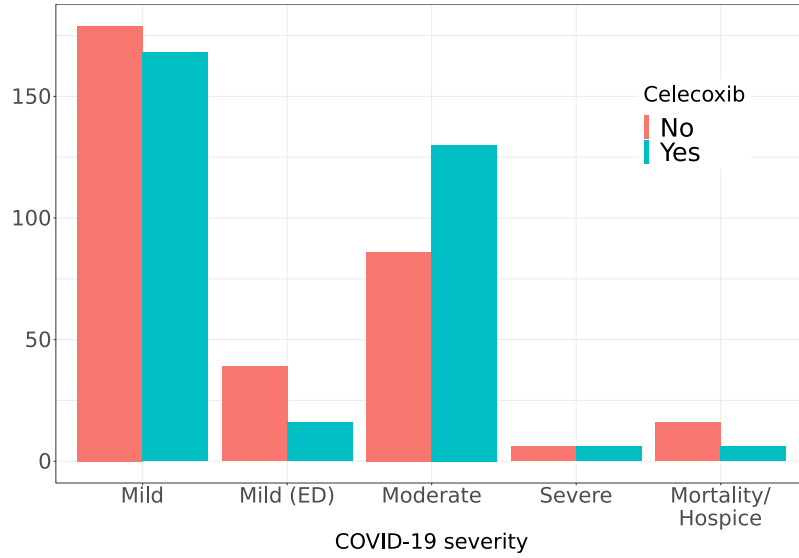

(a)

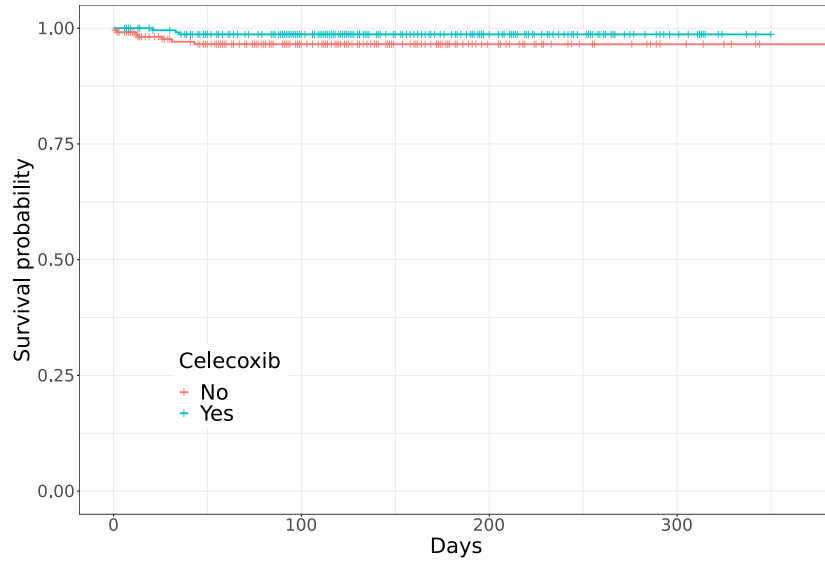

(b)

**Figure S31: Celecoxib (entire subcohort).**(a) Ordinal Logistic Regression Analysis. Y axis: number of individuals in the indicated category. See Table S54. (b). Kaplan Meier Curve. See Table S62 for corresponding Cox multiple regression analysis.

|                            |                 |
|----------------------------|-----------------|
| n                          | 250,553         |
| Age                        | 41.6 ± 20.6     |
| BMI                        | 29.5 ± 17.8     |
| Charlson comorbidity index | 0.58 ± 1.51     |
| Severity Type              |                 |
| - Mild                     | 175,673 (70.1%) |
| - Mild ED                  | 28,160 (11.2%)  |
| - Moderate                 | 38,139 (15.2%)  |
| - Severe                   | 3147 (1.3%)     |
| - Death/hospice            | 5434 (2.2%)     |
| Race                       |                 |
| - African American         | 41,352 (16.5%)  |
| - Asian                    | 6460 (2.%)      |
| - Pacific Islander         | 588 (0.2%)      |
| - White                    | 142,692 (57.0%) |
| - Other                    | 5316 (2.1%)     |
| - Unknown                  | 54,145 (21.6%)  |
| Ethnicity                  |                 |
| - Hispanic or Latino       | 38,885 (15.5%)  |
| - Not Hispanic or Latino   | 182,151 (72.7%) |
| - Unknown                  | 29,517 (15.5%)  |
| Sex                        |                 |
| - Female                   | 134,633 (53.7%) |
| - Male                     | 115,828 (46.2%) |
| - Other                    | 92 (.00%)       |
| Smoking status             |                 |
| - Current or Former        | 15813 (6.3%)    |
| - Nonsmoker                | 234,740 (93.7%) |

**Table S1: Demographic characteristics of patients with COVID-19 included in this study.** Data from up to February 2, 2021 were included



| <b>Indication</b>     | <b>Concept id</b> |
|-----------------------|-------------------|
| Angina pectoris       | 321318            |
| Headache              | 378253            |
| Migraine              | 318736            |
| Myocardial infarction | 4329847           |
| Osteoarthritis        | 80180             |
| Pain                  | 4329041           |
| Rheumatoid arthritis  | 80809             |

Table S2: **OMOP concept ids for disease indications.** For each indication, the concept id shown and all its descendants were used for analysis. The concept set 430608021 version 1 from the N3C enclave was used for Fever. Codesets retrieved March 1, 2021.

| <b>Medication</b> | <b>Concept id</b> |
|-------------------|-------------------|
| aspirin           | 1112807           |
| ibuprofen         | 1177480           |
| naproxen          | 1115008           |
| ketorolac         | 1136980           |
| meloxicam         | 1150345           |
| diclofenac        | 1124300           |
| celecoxib         | 1118084           |
| acetaminophen     | 1125315           |

Table S3: **OMOP concept ids for medications.** For each medication, the concept id shown and all its descendants were used for analysis. Codesets retrieved March 1, 2021.

| <b>medication</b> | <b>indication</b>     | <b>Odds ratio</b> | <b>Evalue (OR)</b> | <b>Evalue (2.5% CI)</b> |
|-------------------|-----------------------|-------------------|--------------------|-------------------------|
| aspirin           | angina pectoris       | 2.7 (2.0-3.6)     | 2.7                | 2.2                     |
|                   | fever                 | 3.5 (2.9-4.3)     | 3.1                | 2.8                     |
|                   | migraine              | 3.0 (1.9-4.5)     | 2.8                | 2.1                     |
|                   | myocardial infarction | 2.4 (1.9-2.9)     | 2.4                | 2.1                     |
|                   | osteoarthritis        | 3.2 (2.8-3.8)     | 3.0                | 2.7                     |
|                   | pain                  | 4.6 (4.1-5.2)     | 3.7                | 3.5                     |
|                   | rheumatoid arthritis  | 3.4 (1.9-6.1)     | 3.1                | 2.1                     |
| ibuprofen         | fever                 | 3.5 (3.0-4.1)     | 3.1                | 2.9                     |
|                   | headache              | 3.0 (2.5-3.6)     | 2.9                | 2.5                     |
|                   | osteoarthritis        | 2.4 (2.0-3.0)     | 2.5                | 2.1                     |
|                   | pain                  | 3.6 (3.2-4.0)     | 3.2                | 3.0                     |
| naproxen          | pain                  | 1.3 (1.1-1.6)     | 1.6                | 1.3                     |
| acetaminophen     | osteoarthritis        | 6.4 (5.8-7.1)     | 4.5                | 4.2                     |
|                   | pain                  | 9.1 (8.5-9.6)     | 5.5                | 5.3                     |
|                   | rheumatoid arthritis  | 6.7 (4.6-9.6)     | 4.6                | 3.7                     |
| ketorolac         | pain                  | 6.5 (5.7-7.5)     | 4.6                | 4.2                     |
| meloxicam         | osteoarthritis        | 1.1 (0.8-1.4)     | 1.2                | 1.0                     |
| diclofenac        | osteoarthritis        | 1.0 (0.8-1.3)     | 1.1                | 1.0                     |
|                   | pain                  | 0.9 (0.8-1.1)     | 1.2                | n/a                     |
| celecoxib         | osteoarthritis        | 1.4 (1.0-2.1)     | 1.7                | 1.0                     |
|                   | pain                  | 1.4 (1.0-1.9)     | 1.6                | 1.0                     |

**Table S4: Evalue analysis.** Analysis was performed with the R Evalue package. E-values are shown for the point estimate and the lower confidence interval limit.

| <b>Covariate</b>  | <b>Odds Ratio (2.5–97.5% CI)</b> | <b>t-value</b> | <b>p-value</b> |
|-------------------|----------------------------------|----------------|----------------|
| Age               | 1.04 (1.02-1.05)                 | 5.08           | <0.001         |
| On drug           | 2.58 (1.93-3.44)                 | 6.43           | <0.001         |
| African American  | 1.11 (0.46-2.67)                 | 0.23           | 1.00           |
| Unknown race      | 1.08 (0.38-3.06)                 | 0.15           | 1.00           |
| Pacific Islander  | 1.72 (0.21-13.95)                | 0.51           | 1.00           |
| Other race        | 1.01 (0.26-3.88)                 | 0.01           | 1.00           |
| White             | 0.85 (0.36-2.00)                 | -0.37          | 1.00           |
| Unknown ethnicity | 0.82 (0.30-2.23)                 | -0.38          | 1.00           |
| Not Hispanic      | 0.69 (0.38-1.27)                 | -1.19          | 1.00           |
| Male              | 1.26 (0.93-1.71)                 | 1.51           | 1.00           |
| Non-smoker        | 0.86 (0.57-1.29)                 | -0.73          | 1.00           |
| Charlson score    | 1.13 (1.07-1.19)                 | 4.37           | <0.001         |
| BMI               | 1.02 (1.00-1.04)                 | 1.61           | 1.00           |

Table S5: **Aspirin (Angina pectoris)**. Ordinal logistic regression analysis. A Bonferroni correction was used to account for the 21 tested medication/indication subcohorts.

| <b>Covariate</b>  | <b>Odds Ratio (2.5–97.5% CI)</b> | <b>t-value</b> | <b>p-value</b> |
|-------------------|----------------------------------|----------------|----------------|
| Age               | 1.04 (1.03-1.05)                 | 11.30          | <0.001         |
| On drug           | 3.50 (2.88-4.26)                 | 12.53          | <0.001         |
| African American  | 2.98 (1.50-5.90)                 | 3.13           | 0.04           |
| Unknown race      | 1.86 (0.90-3.86)                 | 1.67           | 1.00           |
| Pacific Islander  | 4.75 (0.15-149.05)               | 0.89           | 1.00           |
| Other race        | 1.91 (0.46-7.96)                 | 0.88           | 1.00           |
| White             | 1.71 (0.88-3.33)                 | 1.59           | 1.00           |
| Unknown ethnicity | 1.36 (0.80-2.30)                 | 1.14           | 1.00           |
| Not Hispanic      | 0.59 (0.41-0.85)                 | -2.85          | 0.09           |
| Male              | 1.43 (1.18-1.73)                 | 3.63           | 0.006          |
| Non-smoker        | 0.95 (0.71-1.27)                 | -0.33          | 1.00           |
| Charlson score    | 1.13 (1.09-1.17)                 | 6.93           | <0.001         |
| BMI               | 1.01 (1.00-1.02)                 | 2.00           | 0.96           |

**Table S6: Aspirin (Fever).** Ordinal logistic regression analysis. A Bonferroni correction was used to account for the 21 tested medication/indication subcohorts.

| <b>Covariate</b> | <b>Odds Ratio (2.5–97.5% CI)</b> | <b>t-value</b> | <b>p-value</b> |
|------------------|----------------------------------|----------------|----------------|
| Age              | 1.02 (1.01-1.04)                 | 3.13           | 0.04           |
| On drug          | 2.95 (1.93-4.51)                 | 4.99           | <0.001         |
| African American | 1.13 (0.21-6.18)                 | 0.14           | 1.00           |
| Unknown race     | 0.40 (0.05-2.96)                 | -0.90          | 1.00           |
| Pacific Islander | 0.75 (0.05-10.99)                | -0.21          | 1.00           |
| White            | 0.62 (0.12-3.26)                 | -0.57          | 1.00           |
| Not Hispanic     | 0.27 (0.10-0.74)                 | -2.53          | 0.24           |
| Male             | 1.18 (0.69-2.00)                 | 0.60           | 1.00           |
| Non-smoker       | 0.94 (0.47-1.87)                 | -0.18          | 1.00           |
| Charlson score   | 1.09 (1.00-1.20)                 | 1.89           | 1.00           |
| BMI              | 0.99 (0.96-1.01)                 | -0.98          | 1.00           |

Table S7: **Aspirin (Migraine)**. Ordinal logistic regression analysis. A Bonferroni correction was used to account for the 21 tested medication/indication subcohorts.

| <b>Covariate</b>  | <b>Odds Ratio (2.5–97.5% CI)</b> | <b>t-value</b> | <b>p-value</b> |
|-------------------|----------------------------------|----------------|----------------|
| Age               | 1.03 (1.02-1.04)                 | 7.35           | <0.001         |
| On drug           | 2.36 (1.91-2.91)                 | 8.03           | <0.001         |
| African American  | 1.12 (0.55-2.28)                 | 0.31           | 1.00           |
| Unknown race      | 0.72 (0.32-1.64)                 | -0.78          | 1.00           |
| Pacific Islander  | 0.43 (0.05-3.81)                 | -0.75          | 1.00           |
| Other race        | 1.50 (0.45-5.08)                 | 0.66           | 1.00           |
| White             | 0.69 (0.34-1.40)                 | -1.02          | 1.00           |
| Unknown ethnicity | 1.50 (0.80-2.81)                 | 1.28           | 1.00           |
| Not Hispanic      | 0.52 (0.34-0.79)                 | -3.07          | 0.04           |
| Male              | 1.13 (0.91-1.41)                 | 1.15           | 1.00           |
| Non-smoker        | 0.92 (0.69-1.23)                 | -0.54          | 1.00           |
| Charlson score    | 1.04 (0.99-1.08)                 | 1.71           | 1.00           |
| BMI               | 1.00 (0.99-1.02)                 | 0.31           | 1.00           |

Table **S8: Aspirin (Myocardial infarction)**. Ordinal logistic regression analysis. A Bonferroni correction was used to account for the 21 tested medication/indication subcohorts.

| <b>Covariate</b>  | <b>Odds Ratio (2.5–97.5% CI)</b> | <b>t-value</b> | <b>p-value</b> |
|-------------------|----------------------------------|----------------|----------------|
| Age               | 1.04 (1.03-1.05)                 | 10.73          | <0.001         |
| On drug           | 3.25 (2.76-3.83)                 | 14.12          | <0.001         |
| African American  | 1.78 (0.97-3.25)                 | 1.87           | 1.00           |
| Unknown race      | 0.97 (0.48-1.96)                 | -0.07          | 1.00           |
| Pacific Islander  | 4.38 (0.66-29.06)                | 1.53           | 1.00           |
| Other race        | 2.58 (0.91-7.32)                 | 1.78           | 1.00           |
| White             | 1.05 (0.58-1.89)                 | 0.15           | 1.00           |
| Unknown ethnicity | 1.03 (0.57-1.84)                 | 0.08           | 1.00           |
| Not Hispanic      | 0.49 (0.34-0.72)                 | -3.67          | 0.005          |
| Male              | 1.34 (1.14-1.57)                 | 3.54           | 0.008          |
| Non-smoker        | 0.73 (0.58-0.93)                 | -2.62          | 0.18           |
| Charlson score    | 1.16 (1.12-1.20)                 | 9.55           | <0.001         |
| BMI               | 1.01 (1.00-1.02)                 | 1.75           | 1.00           |

Table S9: **Aspirin (Osteoarthritis)**. Ordinal logistic regression analysis. A Bonferroni correction was used to account for the 21 tested medication/indication sub-cohorts.



| <b>Covariate</b>  | <b>Odds Ratio (2.5–97.5% CI)</b> | <b>t-value</b> | <b>p-value</b> |
|-------------------|----------------------------------|----------------|----------------|
| Age               | 1.03 (1.03-1.03)                 | 15.29          | <0.001         |
| On drug           | 4.62 (4.14-5.15)                 | 27.62          | <0.001         |
| African American  | 1.03 (0.72-1.49)                 | 0.17           | 1.00           |
| Unknown race      | 0.67 (0.44-1.00)                 | -1.94          | 1.00           |
| Pacific Islander  | 0.78 (0.30-2.04)                 | -0.51          | 1.00           |
| Other race        | 0.79 (0.44-1.43)                 | -0.79          | 1.00           |
| White             | 0.65 (0.45-0.93)                 | -2.37          | 0.37           |
| Unknown ethnicity | 1.50 (1.07-2.08)                 | 2.38           | 0.36           |
| Not Hispanic      | 0.57 (0.47-0.70)                 | -5.32          | <0.001         |
| Male              | 1.36 (1.23-1.51)                 | 5.80           | <0.001         |
| Non-smoker        | 0.88 (0.74-1.03)                 | -1.59          | 1.00           |
| Charlson score    | 1.14 (1.11-1.16)                 | 11.78          | <0.001         |
| BMI               | 1.01 (1.00-1.02)                 | 2.59           | 0.20           |

Table S10: **Aspirin (Pain)**. Ordinal logistic regression analysis. A Bonferroni correction was used to account for the 21 tested medication/indication subcohorts.

| <b>Covariate</b>  | <b>Odds Ratio (2.5–97.5% CI)</b> | <b>t-value</b> | <b>p-value</b> |
|-------------------|----------------------------------|----------------|----------------|
| Age               | 1.04 (1.02-1.07)                 | 3.33           | 0.02           |
| On drug           | 3.36 (1.86-6.07)                 | 4.02           | 0.001          |
| African American  | 2.17 (0.36-13.03)                | 0.85           | 1.00           |
| Unknown race      | 0.91 (0.06-13.97)                | -0.07          | 1.00           |
| Other race        | 3.50 (0.07-166.59)               | 0.64           | 1.00           |
| White             | 1.38 (0.24-8.07)                 | 0.36           | 1.00           |
| Unknown ethnicity | 1.43 (0.10-20.08)                | 0.26           | 1.00           |
| Not Hispanic      | 0.38 (0.11-1.38)                 | -1.47          | 1.00           |
| Male              | 0.89 (0.47-1.68)                 | -0.36          | 1.00           |
| Non-smoker        | 1.28 (0.59-2.77)                 | 0.63           | 1.00           |
| Charlson score    | 1.07 (0.97-1.18)                 | 1.42           | 1.00           |
| BMI               | 1.01 (0.97-1.05)                 | 0.49           | 1.00           |

**Table S11: Aspirin (Rheumatoid arthritis).** Ordinal logistic regression analysis. A Bonferroni correction was used to account for the 21 tested medication/indication subcohorts.

| <b>Covariate</b>  | <b>Odds Ratio (2.5–97.5% CI)</b> | <b>t-value</b> | <b>p-value</b> |
|-------------------|----------------------------------|----------------|----------------|
| Age               | 1.02 (1.02-1.03)                 | 10.74          | <0.001         |
| On drug           | 3.50 (3.00-4.09)                 | 15.86          | <0.001         |
| African American  | 1.36 (0.85-2.17)                 | 1.27           | 1.00           |
| Unknown race      | 1.21 (0.72-2.03)                 | 0.70           | 1.00           |
| Pacific Islander  | 0.78 (0.09-6.51)                 | -0.23          | 1.00           |
| Other race        | 0.89 (0.47-1.71)                 | -0.34          | 1.00           |
| White             | 0.92 (0.57-1.46)                 | -0.37          | 1.00           |
| Unknown ethnicity | 1.22 (0.78-1.90)                 | 0.88           | 1.00           |
| Not Hispanic      | 0.59 (0.46-0.77)                 | -3.93          | 0.002          |
| Male              | 1.30 (1.12-1.52)                 | 3.44           | 0.01           |
| Non-smoker        | 0.79 (0.63-0.99)                 | -2.06          | 0.84           |
| Charlson score    | 1.19 (1.13-1.25)                 | 7.11           | <0.001         |
| BMI               | 1.00 (0.99-1.01)                 | 0.77           | 1.00           |

Table **S12: Ibuprofen (Fever)**. Ordinal logistic regression analysis. A Bonferroni correction was used to account for the 21 tested medication/indication subcohorts.

| <b>Covariate</b>  | <b>Odds Ratio (2.5–97.5% CI)</b> | <b>t-value</b> | <b>p-value</b> |
|-------------------|----------------------------------|----------------|----------------|
| Age               | 1.02 (1.01-1.03)                 | 6.75           | <0.001         |
| On drug           | 3.01 (2.49-3.64)                 | 11.30          | <0.001         |
| African American  | 1.11 (0.64-1.93)                 | 0.36           | 1.00           |
| Unknown race      | 0.61 (0.32-1.15)                 | -1.53          | 1.00           |
| Other race        | 0.53 (0.23-1.22)                 | -1.49          | 1.00           |
| White             | 0.62 (0.35-1.07)                 | -1.72          | 1.00           |
| Unknown ethnicity | 3.59 (1.54-8.37)                 | 2.96           | 0.07           |
| Not Hispanic      | 0.50 (0.36-0.71)                 | -3.97          | 0.002          |
| Male              | 1.26 (1.03-1.54)                 | 2.24           | 0.53           |
| Non-smoker        | 0.79 (0.61-1.03)                 | -1.73          | 1.00           |
| Charlson score    | 1.16 (1.09-1.23)                 | 4.93           | <0.001         |
| BMI               | 1.01 (1.00-1.02)                 | 1.99           | 0.97           |

**Table S13: Ibuprofen (Headache).** Ordinal logistic regression analysis. A Bonferroni correction was used to account for the 21 tested medication/indication sub-cohorts.

| <b>Covariate</b>  | <b>Odds Ratio (2.5–97.5% CI)</b> | <b>t-value</b> | <b>p-value</b> |
|-------------------|----------------------------------|----------------|----------------|
| Age               | 1.04 (1.03-1.05)                 | 8.42           | <0.001         |
| On drug           | 2.44 (1.96-3.04)                 | 8.00           | <0.001         |
| African American  | 0.54 (0.25-1.18)                 | -1.55          | 1.00           |
| Unknown race      | 0.30 (0.12-0.73)                 | -2.64          | 0.17           |
| Other race        | 0.12 (0.03-0.50)                 | -2.90          | 0.08           |
| White             | 0.32 (0.15-0.70)                 | -2.84          | 0.09           |
| Unknown ethnicity | 1.86 (0.77-4.52)                 | 1.37           | 1.00           |
| Not Hispanic      | 0.63 (0.40-0.99)                 | -1.99          | 0.97           |
| Male              | 1.32 (1.05-1.66)                 | 2.40           | 0.34           |
| Non-smoker        | 0.68 (0.47-0.98)                 | -2.10          | 0.76           |
| Charlson score    | 1.17 (1.11-1.24)                 | 5.57           | <0.001         |
| BMI               | 1.01 (1.00-1.03)                 | 2.01           | 0.94           |

**Table S14: Ibuprofen (Osteoarthritis).** Ordinal logistic regression analysis. A Bonferroni correction was used to account for the 21 tested medication/indication subcohorts.

| <b>Covariate</b>  | <b>Odds Ratio (2.5–97.5% CI)</b> | <b>t-value</b> | <b>p-value</b> |
|-------------------|----------------------------------|----------------|----------------|
| Age               | 1.02 (1.02-1.02)                 | 12.95          | <0.001         |
| On drug           | 3.60 (3.25-3.99)                 | 24.30          | <0.001         |
| African American  | 1.31 (0.95-1.82)                 | 1.64           | 1.00           |
| Unknown race      | 0.78 (0.54-1.12)                 | -1.37          | 1.00           |
| Pacific Islander  | 1.25 (0.50-3.12)                 | 0.48           | 1.00           |
| Other race        | 0.85 (0.52-1.37)                 | -0.67          | 1.00           |
| White             | 0.79 (0.57-1.09)                 | -1.45          | 1.00           |
| Unknown ethnicity | 1.34 (0.96-1.87)                 | 1.73           | 1.00           |
| Not Hispanic      | 0.55 (0.46-0.65)                 | -6.72          | <0.001         |
| Male              | 1.32 (1.19-1.47)                 | 5.28           | <0.001         |
| Non-smoker        | 0.72 (0.61-0.84)                 | -4.07          | <0.001         |
| Charlson score    | 1.15 (1.11-1.19)                 | 7.93           | <0.001         |
| BMI               | 1.01 (1.00-1.02)                 | 2.89           | 0.08           |

**Table S15: Ibuprofen (Pain).** Ordinal logistic regression analysis. A Bonferroni correction was used to account for the 21 tested medication/indication subcohorts.

| <b>Covariate</b>  | <b>Odds Ratio (2.5–97.5% CI)</b> | <b>t-value</b> | <b>p-value</b> |
|-------------------|----------------------------------|----------------|----------------|
| Age               | 1.01 (1.01-1.02)                 | 4.27           | <0.001         |
| On drug           | 1.33 (1.11-1.59)                 | 3.13           | 0.04           |
| African American  | 1.54 (0.83-2.85)                 | 1.37           | 1.00           |
| Unknown race      | 0.68 (0.35-1.33)                 | -1.13          | 1.00           |
| Pacific Islander  | 0.59 (0.09-3.87)                 | -0.54          | 1.00           |
| Other race        | 0.72 (0.30-1.71)                 | -0.74          | 1.00           |
| White             | 0.68 (0.37-1.25)                 | -1.24          | 1.00           |
| Unknown ethnicity | 0.64 (0.34-1.20)                 | -1.39          | 1.00           |
| Not Hispanic      | 0.44 (0.33-0.59)                 | -5.48          | <0.001         |
| Male              | 1.21 (1.00-1.46)                 | 1.99           | 0.98           |
| Non-smoker        | 0.61 (0.47-0.80)                 | -3.57          | 0.007          |
| Charlson score    | 1.26 (1.19-1.34)                 | 7.33           | <0.001         |
| BMI               | 1.01 (1.00-1.02)                 | 1.34           | 1.00           |

Table S16: **Naproxen (Pain)**. Ordinal logistic regression analysis. A Bonferroni correction was used to account for the 21 tested medication/indication subcohorts.

| <b>Covariate</b>  | <b>Odds Ratio (2.5–97.5% CI)</b> | <b>t-value</b> | <b>p-value</b> |
|-------------------|----------------------------------|----------------|----------------|
| Age               | 1.04 (1.03-1.04)                 | 17.70          | <0.001         |
| On drug           | 6.39 (5.75-7.09)                 | 34.90          | <0.001         |
| African American  | 1.37 (0.93-2.02)                 | 1.60           | 1.00           |
| Unknown race      | 0.75 (0.49-1.17)                 | -1.27          | 1.00           |
| Pacific Islander  | 1.23 (0.04-41.44)                | 0.12           | 1.00           |
| Other race        | 0.93 (0.51-1.69)                 | -0.25          | 1.00           |
| White             | 0.75 (0.51-1.10)                 | -1.48          | 1.00           |
| Unknown ethnicity | 1.08 (0.79-1.47)                 | 0.49           | 1.00           |
| Not Hispanic      | 0.48 (0.38-0.61)                 | -5.99          | <0.001         |
| Male              | 1.46 (1.32-1.61)                 | 7.44           | <0.001         |
| Non-smoker        | 0.81 (0.70-0.95)                 | -2.70          | 0.15           |
| Charlson score    | 1.17 (1.14-1.19)                 | 15.07          | <0.001         |
| BMI               | 1.01 (1.01-1.02)                 | 4.37           | <0.001         |

Table **S17: Acetaminophen (Osteoarthritis)**. Ordinal logistic regression analysis. A Bonferroni correction was used to account for the 21 tested medication/indication subcohorts.



| <b>Covariate</b>  | <b>Odds Ratio (2.5–97.5% CI)</b> | <b>t-value</b> | <b>p-value</b> |
|-------------------|----------------------------------|----------------|----------------|
| Age               | 1.03 (1.02-1.03)                 | 31.00          | <0.001         |
| On drug           | 9.05 (8.53-9.60)                 | 73.29          | <0.001         |
| African American  | 1.15 (0.97-1.36)                 | 1.62           | 1.00           |
| Unknown race      | 0.76 (0.63-0.91)                 | -2.92          | 0.07           |
| Pacific Islander  | 1.25 (0.72-2.17)                 | 0.80           | 1.00           |
| Other race        | 0.84 (0.64-1.10)                 | -1.28          | 1.00           |
| White             | 0.68 (0.58-0.80)                 | -4.59          | <0.001         |
| Unknown ethnicity | 1.17 (1.02-1.35)                 | 2.26           | 0.50           |
| Not Hispanic      | 0.59 (0.54-0.65)                 | -10.47         | <0.001         |
| Male              | 1.24 (1.18-1.31)                 | 7.85           | <0.001         |
| Non-smoker        | 0.79 (0.72-0.86)                 | -5.17          | <0.001         |
| Charlson score    | 1.18 (1.16-1.19)                 | 23.17          | <0.001         |
| BMI               | 1.01 (1.01-1.01)                 | 5.74           | <0.001         |

Table S18: **Acetaminophen (Pain)**. Ordinal logistic regression analysis. A Bonferroni correction was used to account for the 21 tested medication/indication sub-cohorts.

| <b>Covariate</b>  | <b>Odds Ratio (2.5–97.5% CI)</b> | <b>t-value</b> | <b>p-value</b> |
|-------------------|----------------------------------|----------------|----------------|
| Age               | 1.03 (1.02-1.04)                 | 4.73           | <0.001         |
| On drug           | 6.66 (4.62-9.59)                 | 10.17          | <0.001         |
| African American  | 0.36 (0.09-1.44)                 | -1.45          | 1.00           |
| Unknown race      | 0.47 (0.10-2.25)                 | -0.95          | 1.00           |
| Other race        | 0.09 (0.02-0.48)                 | -2.79          | 0.11           |
| White             | 0.26 (0.07-1.01)                 | -1.94          | 1.00           |
| Unknown ethnicity | 2.03 (0.75-5.56)                 | 1.39           | 1.00           |
| Not Hispanic      | 1.04 (0.53-2.04)                 | 0.12           | 1.00           |
| Male              | 1.45 (0.99-2.12)                 | 1.90           | 1.00           |
| Non-smoker        | 0.76 (0.44-1.31)                 | -0.99          | 1.00           |
| Charlson score    | 1.10 (1.02-1.18)                 | 2.39           | 0.35           |
| BMI               | 1.02 (1.00-1.05)                 | 2.14           | 0.68           |

**Table S19: Acetaminophen (Rheumatoid arthritis).** Ordinal logistic regression analysis. A Bonferroni correction was used to account for the 21 tested medication/indication subcohorts.

| <b>Covariate</b>  | <b>Odds Ratio (2.5–97.5% CI)</b> | <b>t-value</b> | <b>p-value</b> |
|-------------------|----------------------------------|----------------|----------------|
| Age               | 1.02 (1.01-1.02)                 | 8.27           | <0.001         |
| On drug           | 6.55 (5.72-7.50)                 | 27.22          | <0.001         |
| African American  | 1.04 (0.68-1.61)                 | 0.20           | 1.00           |
| Unknown race      | 0.78 (0.49-1.25)                 | -1.04          | 1.00           |
| Pacific Islander  | 0.53 (0.09-3.00)                 | -0.72          | 1.00           |
| Other race        | 1.04 (0.56-1.94)                 | 0.12           | 1.00           |
| White             | 0.62 (0.41-0.95)                 | -2.18          | 0.62           |
| Unknown ethnicity | 1.52 (0.92-2.51)                 | 1.63           | 1.00           |
| Not Hispanic      | 0.77 (0.63-0.94)                 | -2.54          | 0.23           |
| Male              | 1.12 (0.98-1.28)                 | 1.71           | 1.00           |
| Non-smoker        | 0.65 (0.52-0.82)                 | -3.68          | 0.005          |
| Charlson score    | 1.20 (1.14-1.25)                 | 7.75           | <0.001         |
| BMI               | 1.01 (1.01-1.02)                 | 3.24           | 0.03           |

Table S20: **Ketorolac (Pain)**. Ordinal logistic regression analysis. A Bonferroni correction was used to account for the 21 tested medication/indication subcohorts.

| <b>Covariate</b>  | <b>Odds Ratio (2.5–97.5% CI)</b> | <b>t-value</b> | <b>p-value</b> |
|-------------------|----------------------------------|----------------|----------------|
| Age               | 1.03 (1.02-1.04)                 | 4.92           | <0.001         |
| On drug           | 1.05 (0.79-1.41)                 | 0.36           | 1.00           |
| African American  | 0.99 (0.38-2.62)                 | -0.02          | 1.00           |
| Unknown race      | 1.54 (0.47-5.03)                 | 0.71           | 1.00           |
| Other race        | 1.68 (0.36-7.79)                 | 0.66           | 1.00           |
| White             | 0.53 (0.21-1.37)                 | -1.31          | 1.00           |
| Unknown ethnicity | 3.13 (0.63-15.53)                | 1.40           | 1.00           |
| Not Hispanic      | 1.17 (0.56-2.44)                 | 0.41           | 1.00           |
| Male              | 1.13 (0.83-1.54)                 | 0.79           | 1.00           |
| Non-smoker        | 0.56 (0.33-0.94)                 | -2.18          | 0.62           |
| Charlson score    | 1.28 (1.18-1.38)                 | 6.09           | <0.001         |
| BMI               | 1.02 (1.00-1.04)                 | 2.20           | 0.58           |

Table **S21: Meloxicam (Osteoarthritis)**. Ordinal logistic regression analysis. A Bonferroni correction was used to account for the 21 tested medication/indication subcohorts.

| <b>Covariate</b>  | <b>Odds Ratio (2.5–97.5% CI)</b> | <b>t-value</b> | <b>p-value</b> |
|-------------------|----------------------------------|----------------|----------------|
| Age               | 1.04 (1.03-1.05)                 | 7.13           | <0.001         |
| On drug           | 1.03 (0.81-1.30)                 | 0.25           | 1.00           |
| African American  | 0.52 (0.26-1.03)                 | -1.88          | 1.00           |
| Unknown race      | 0.34 (0.13-0.88)                 | -2.23          | 0.54           |
| Other race        | 0.53 (0.11-2.57)                 | -0.79          | 1.00           |
| White             | 0.29 (0.15-0.57)                 | -3.61          | 0.006          |
| Unknown ethnicity | 3.08 (1.12-8.43)                 | 2.19           | 0.60           |
| Not Hispanic      | 0.83 (0.39-1.76)                 | -0.47          | 1.00           |
| Male              | 0.99 (0.76-1.29)                 | -0.06          | 1.00           |
| Non-smoker        | 0.61 (0.43-0.88)                 | -2.69          | 0.15           |
| Charlson score    | 1.23 (1.17-1.29)                 | 7.97           | <0.001         |
| BMI               | 1.00 (0.98-1.01)                 | -0.39          | 1.00           |

Table S22: **Diclofenac (Osteoarthritis)**. Ordinal logistic regression analysis. A Bonferroni correction was used to account for the 21 tested medication/indication subcohorts.

| <b>Covariate</b>  | <b>Odds Ratio (2.5–97.5% CI)</b> | <b>t-value</b> | <b>p-value</b> |
|-------------------|----------------------------------|----------------|----------------|
| Age               | 1.03 (1.02-1.03)                 | 7.95           | <0.001         |
| On drug           | 0.95 (0.79-1.14)                 | -0.57          | 1.00           |
| African American  | 0.99 (0.58-1.66)                 | -0.05          | 1.00           |
| Unknown race      | 0.51 (0.26-1.01)                 | -1.92          | 1.00           |
| Pacific Islander  | 1.47 (0.16-13.55)                | 0.34           | 1.00           |
| Other race        | 0.59 (0.15-2.36)                 | -0.74          | 1.00           |
| White             | 0.52 (0.31-0.87)                 | -2.50          | 0.26           |
| Unknown ethnicity | 1.47 (0.72-3.01)                 | 1.06           | 1.00           |
| Not Hispanic      | 0.51 (0.32-0.82)                 | -2.77          | 0.12           |
| Male              | 1.11 (0.91-1.36)                 | 1.05           | 1.00           |
| Non-smoker        | 0.67 (0.51-0.90)                 | -2.68          | 0.15           |
| Charlson score    | 1.21 (1.16-1.26)                 | 8.88           | <0.001         |
| BMI               | 1.00 (0.98-1.01)                 | -0.69          | 1.00           |

Table S23: **Diclofenac (Pain)**. Ordinal logistic regression analysis. A Bonferroni correction was used to account for the 21 tested medication/indication subcohorts.

| <b>Covariate</b>  | <b>Odds Ratio (2.5–97.5% CI)</b> | <b>t-value</b> | <b>p-value</b> |
|-------------------|----------------------------------|----------------|----------------|
| Age               | 1.04 (1.03-1.06)                 | 4.88           | <0.001         |
| On drug           | 1.43 (0.97-2.12)                 | 1.81           | 1.00           |
| African American  | 2.72 (0.24-30.85)                | 0.81           | 1.00           |
| Unknown race      | 1.11 (0.08-15.80)                | 0.08           | 1.00           |
| Pacific Islander  | 1.37 (0.03-55.75)                | 0.17           | 1.00           |
| White             | 1.20 (0.11-13.06)                | 0.15           | 1.00           |
| Unknown ethnicity | 0.75 (0.16-3.55)                 | -0.37          | 1.00           |
| Not Hispanic      | 0.89 (0.31-2.57)                 | -0.22          | 1.00           |
| Male              | 1.15 (0.77-1.73)                 | 0.68           | 1.00           |
| Non-smoker        | 0.90 (0.40-2.03)                 | -0.26          | 1.00           |
| Charlson score    | 1.28 (1.17-1.40)                 | 5.35           | <0.001         |
| BMI               | 1.01 (0.99-1.04)                 | 0.96           | 1.00           |

Table S24: **Celecoxib (Osteoarthritis)**. Ordinal logistic regression analysis. A Bonferroni correction was used to account for the 21 tested medication/indication subcohorts.

| <b>Covariate</b>  | <b>Odds Ratio (2.5–97.5% CI)</b> | <b>t-value</b> | <b>p-value</b> |
|-------------------|----------------------------------|----------------|----------------|
| Age               | 1.03 (1.02-1.05)                 | 4.70           | <0.001         |
| On drug           | 1.39 (0.99-1.94)                 | 1.92           | 1.00           |
| African American  | 0.78 (0.09-6.71)                 | -0.23          | 1.00           |
| Unknown race      | 0.34 (0.04-3.33)                 | -0.92          | 1.00           |
| Other race        | 0.36 (0.03-4.07)                 | -0.82          | 1.00           |
| White             | 0.35 (0.04-2.89)                 | -0.98          | 1.00           |
| Unknown ethnicity | 1.90 (0.71-5.07)                 | 1.27           | 1.00           |
| Not Hispanic      | 0.43 (0.20-0.95)                 | -2.08          | 0.78           |
| Male              | 1.09 (0.76-1.57)                 | 0.47           | 1.00           |
| Non-smoker        | 0.53 (0.30-0.96)                 | -2.11          | 0.73           |
| Charlson score    | 1.26 (1.15-1.39)                 | 4.88           | <0.001         |
| BMI               | 1.00 (0.98-1.03)                 | 0.34           | 1.00           |

Table S25: **Celecoxib (Pain)**. Ordinal logistic regression analysis. A Bonferroni correction was used to account for the 21 tested medication/indication subcohorts.



| <b>Predictor</b>  | <b>coef</b> | <b>exp(coef)</b> | <b>se(coef)</b> | <b>z</b> | <b>Pr(&gt;  z )</b> | <b>(2.5–97.5% CI)</b> |
|-------------------|-------------|------------------|-----------------|----------|---------------------|-----------------------|
| Age               | 0.08        | 1.08             | 0.02            | 4.67     | <0.001              | 1.04-1.11             |
| On drug           | 0.38        | 1.46             | 0.28            | 1.37     | 1.00                | 0.85-2.51             |
| African American  | 0.54        | 0.58             | 0.82            | -0.66    | 1.00                | 0.12-2.90             |
| Unknown race      | 2.62        | 0.07             | 1.60            | -1.64    | 1.00                | 0.00-1.67             |
| Pacific Islander  | 15.40       | 0.00             | 5918.84         | -0.00    | 1.00                | 0.00-inf              |
| Other race        | 15.86       | 0.00             | 4631.93         | -0.00    | 1.00                | 0.00-inf              |
| White             | 0.27        | 0.76             | 0.78            | -0.35    | 1.00                | 0.16-3.54             |
| Unknown ethnicity | 2.53        | 12.62            | 1.74            | 1.46     | 1.00                | 0.42-378.57           |
| Not Hispanic      | 0.85        | 2.35             | 1.04            | 0.82     | 1.00                | 0.31-17.89            |
| Male              | 0.41        | 1.51             | 0.29            | 1.39     | 1.00                | 0.85-2.68             |
| Non-smoker        | 0.20        | 1.22             | 0.41            | 0.48     | 1.00                | 0.54-2.75             |
| Charlson score    | 0.15        | 1.16             | 0.04            | 3.59     | 0.007               | 1.07-1.25             |
| BMI               | 0.01        | 1.01             | 0.02            | 0.56     | 1.00                | 0.97-1.05             |

Table S26: **Aspirin (Angina pectoris)**. Multivariate Cox regression analysis. A Bonferroni correction was used to account for the 21 tested medication/indication subcohorts.

| <b>Predictor</b>  | <b>coef</b> | <b>exp(coef)</b> | <b>se(coef)</b> | <b>z</b> | <b>Pr(&gt;  z )</b> | <b>(2.5–97.5% CI)</b> |
|-------------------|-------------|------------------|-----------------|----------|---------------------|-----------------------|
| Age               | 0.08        | 1.09             | 0.01            | 8.42     | <0.001              | 1.07-1.11             |
| On drug           | 0.64        | 1.90             | 0.20            | 3.25     | 0.02                | 1.29-2.80             |
| African American  | 16.12       | 10067380.00      | 2065.42         | 0.01     | 1.00                | 0.00-inf              |
| Unknown race      | 15.78       | 7097027.00       | 2065.42         | 0.01     | 1.00                | 0.00-inf              |
| Pacific Islander  | 0.77        | 2.17             | 75358.36        | 0.00     | 1.00                | 0.00-inf              |
| Other race        | 16.59       | 16084400.00      | 2065.42         | 0.01     | 1.00                | 0.00-inf              |
| White             | 16.18       | 10614450.00      | 2065.42         | 0.01     | 1.00                | 0.00-inf              |
| Unknown ethnicity | 0.45        | 0.64             | 0.60            | -0.75    | 1.00                | 0.19-2.08             |
| Not Hispanic      | 0.23        | 0.79             | 0.41            | -0.56    | 1.00                | 0.35-1.78             |
| Male              | 0.66        | 1.93             | 0.21            | 3.18     | 0.03                | 1.29-2.91             |
| Non-smoker        | 0.38        | 1.47             | 0.34            | 1.14     | 1.00                | 0.76-2.83             |
| Charlson score    | 0.05        | 1.05             | 0.03            | 1.66     | 1.00                | 0.99-1.11             |
| BMI               | 0.03        | 1.03             | 0.01            | 2.40     | 0.35                | 1.01-1.06             |

Table S27: **Aspirin (Fever)**. Multivariate Cox regression analysis. A Bonferroni correction was used to account for the 21 tested medication/indication subcohorts.

| <b>Predictor</b> | <b>coef</b> | <b>exp(coef)</b> | <b>se(coef)</b> | <b>z</b> | <b>Pr(&gt;  z )</b> | <b>(2.5–97.5% CI)</b> |
|------------------|-------------|------------------|-----------------|----------|---------------------|-----------------------|
| Age              | 0.08        | 1.08             | 0.03            | 2.57     | 0.21                | 1.02-1.15             |
| On drug          | 1.74        | 5.71             | 0.85            | 2.05     | 0.84                | 1.08-30.10            |
| African American | 15.73       | 6758044.00       | 16529.39        | 0.00     | 1.00                | 0.00-inf              |
| Unknown race     | 16.02       | 9108901.00       | 16529.39        | 0.00     | 1.00                | 0.00-inf              |
| Pacific Islander | 2.81        | 0.06             | 39463.91        | -0.00    | 1.00                | 0.00-inf              |
| Other race       | 2.54        | 0.08             | 70118.44        | -0.00    | 1.00                | 0.00-inf              |
| White            | 16.46       | 14053050.00      | 16529.39        | 0.00     | 1.00                | 0.00-inf              |
| Not Hispanic     | 1.96        | 0.14             | 1.62            | -1.21    | 1.00                | 0.01-3.37             |
| Male             | 0.80        | 2.24             | 0.72            | 1.12     | 1.00                | 0.54-9.19             |
| Non-smoker       | 18.28       | 86796880.00      | 9605.03         | 0.00     | 1.00                | 0.00-inf              |
| Charlson score   | 0.10        | 1.11             | 0.12            | 0.86     | 1.00                | 0.88-1.40             |
| BMI              | 0.00        | 1.00             | 0.04            | 0.06     | 1.00                | 0.92-1.09             |

Table S28: Aspirin (Migraine). Multivariate Cox regression analysis. A Bonferroni correction was used to account for the 21 tested medication/indication sub-cohorts.

| <b>Predictor</b>  | <b>coef</b> | <b>exp(coef)</b> | <b>se(coef)</b> | <b>z</b> | <b>Pr(&gt;  z )</b> | <b>(2.5–97.5% CI)</b> |
|-------------------|-------------|------------------|-----------------|----------|---------------------|-----------------------|
| Age               | 0.06        | 1.06             | 0.01            | 6.81     | <0.001              | 1.04-1.08             |
| On drug           | 0.44        | 1.56             | 0.17            | 2.68     | 0.15                | 1.13-2.16             |
| African American  | 0.88        | 2.42             | 1.02            | 0.87     | 1.00                | 0.33-17.78            |
| Unknown race      | 1.24        | 3.45             | 1.06            | 1.17     | 1.00                | 0.43-27.69            |
| Pacific Islander  | 11.58       | 0.00             | 1522.49         | -0.01    | 1.00                | 0.00-inf              |
| Other race        | 1.69        | 5.42             | 1.24            | 1.37     | 1.00                | 0.48-61.21            |
| White             | 0.89        | 2.43             | 1.01            | 0.88     | 1.00                | 0.33-17.62            |
| Unknown ethnicity | 0.39        | 0.68             | 0.48            | -0.81    | 1.00                | 0.26-1.75             |
| Not Hispanic      | 0.14        | 0.87             | 0.34            | -0.42    | 1.00                | 0.45-1.69             |
| Male              | 0.37        | 1.45             | 0.18            | 2.06     | 0.82                | 1.02-2.06             |
| Non-smoker        | 0.16        | 1.17             | 0.27            | 0.58     | 1.00                | 0.69-1.97             |
| Charlson score    | 0.01        | 1.01             | 0.03            | 0.29     | 1.00                | 0.95-1.07             |
| BMI               | 0.00        | 1.00             | 0.01            | 0.30     | 1.00                | 0.98-1.03             |

Table S29: **Aspirin (Myocardial infarction)**. Multivariate Cox regression analysis. A Bonferroni correction was used to account for the 21 tested medication/indication subcohorts.

| <b>Predictor</b>  | <b>coef</b> | <b>exp(coef)</b> | <b>se(coef)</b> | <b>z</b> | <b>Pr(&gt;  z )</b> | <b>(2.5–97.5% CI)</b> |
|-------------------|-------------|------------------|-----------------|----------|---------------------|-----------------------|
| Age               | 0.05        | 1.05             | 0.01            | 6.22     | <0.001              | 1.04-1.07             |
| On drug           | 0.27        | 1.31             | 0.15            | 1.78     | 1.00                | 0.97-1.78             |
| African American  | 0.26        | 0.77             | 0.60            | -0.43    | 1.00                | 0.24-2.52             |
| Unknown race      | 0.41        | 0.66             | 0.76            | -0.54    | 1.00                | 0.15-2.92             |
| Pacific Islander  | 13.80       | 0.00             | 1533.28         | -0.01    | 1.00                | 0.00-inf              |
| Other race        | 0.57        | 1.77             | 0.92            | 0.62     | 1.00                | 0.29-10.74            |
| White             | 0.08        | 1.08             | 0.59            | 0.14     | 1.00                | 0.34-3.47             |
| Unknown ethnicity | 0.38        | 1.46             | 0.62            | 0.61     | 1.00                | 0.43-4.94             |
| Not Hispanic      | 0.58        | 1.78             | 0.48            | 1.20     | 1.00                | 0.70-4.55             |
| Male              | 0.29        | 1.33             | 0.15            | 1.86     | 1.00                | 0.98-1.81             |
| Non-smoker        | 0.45        | 0.64             | 0.20            | -2.22    | 0.55                | 0.43-0.95             |
| Charlson score    | 0.11        | 1.12             | 0.02            | 5.06     | <0.001              | 1.07-1.17             |
| BMI               | 0.01        | 1.01             | 0.01            | 0.97     | 1.00                | 0.99-1.03             |

Table S30: **Aspirin (Osteoarthritis)**. Multivariate Cox regression analysis. A Bonferroni correction was used to account for the 21 tested medication/indication subcohorts.

| <b>Predictor</b>  | <b>coef</b> | <b>exp(coef)</b> | <b>se(coef)</b> | <b>z</b> | <b>Pr(&gt;  z )</b> | <b>(2.5–97.5% CI)</b> |
|-------------------|-------------|------------------|-----------------|----------|---------------------|-----------------------|
| Age               | 0.06        | 1.06             | 0.01            | 9.77     | <0.001              | 1.05-1.07             |
| On drug           | 0.77        | 2.15             | 0.13            | 5.87     | <0.001              | 1.66-2.78             |
| African American  | 0.36        | 0.70             | 0.36            | -1.01    | 1.00                | 0.35-1.40             |
| Unknown race      | 0.40        | 0.67             | 0.43            | -0.94    | 1.00                | 0.29-1.55             |
| Pacific Islander  | 13.72       | 0.00             | 1224.62         | -0.01    | 1.00                | 0.00-inf              |
| Other race        | 1.05        | 0.35             | 1.06            | -0.98    | 1.00                | 0.04-2.82             |
| White             | 0.28        | 0.76             | 0.34            | -0.81    | 1.00                | 0.39-1.49             |
| Unknown ethnicity | 0.04        | 0.96             | 0.36            | -0.10    | 1.00                | 0.47-1.97             |
| Not Hispanic      | 0.13        | 0.87             | 0.26            | -0.51    | 1.00                | 0.52-1.46             |
| Male              | 0.45        | 1.58             | 0.13            | 3.62     | 0.006               | 1.23-2.02             |
| Non-smoker        | 0.15        | 0.86             | 0.19            | -0.80    | 1.00                | 0.59-1.25             |
| Charlson score    | 0.10        | 1.11             | 0.02            | 5.47     | <0.001              | 1.07-1.15             |
| BMI               | 0.01        | 1.01             | 0.01            | 0.86     | 1.00                | 0.99-1.02             |

Table S31: **Aspirin (Pain)**. Multivariate Cox regression analysis. A Bonferroni correction was used to account for the 21 tested medication/indication subcohorts.

| <b>Predictor</b>  | <b>coef</b> | <b>exp(coef)</b> | <b>se(coef)</b> | <b>z</b> | <b>Pr(&gt;  z )</b> | <b>(2.5–97.5% CI)</b> |
|-------------------|-------------|------------------|-----------------|----------|---------------------|-----------------------|
| Age               | 0.06        | 1.07             | 0.03            | 1.96     | 1.00                | 1.00-1.14             |
| On drug           | 0.35        | 0.70             | 0.59            | -0.60    | 1.00                | 0.22-2.22             |
| African American  | 16.32       | 12253920.00      | 7425.16         | 0.00     | 1.00                | 0.00-inf              |
| Unknown race      | 14.37       | 1749668.00       | 7425.16         | 0.00     | 1.00                | 0.00-inf              |
| Other race        | 0.13        | 1.14             | 31881.41        | 0.00     | 1.00                | 0.00-inf              |
| White             | 15.69       | 6530627.00       | 7425.16         | 0.00     | 1.00                | 0.00-inf              |
| Unknown ethnicity | 0.30        | 1.35             | 1.41            | 0.21     | 1.00                | 0.08-21.43            |
| Not Hispanic      | 2.46        | 0.09             | 0.91            | -2.70    | 0.14                | 0.01-0.51             |
| Male              | 0.38        | 0.68             | 0.75            | -0.51    | 1.00                | 0.16-2.97             |
| Non-smoker        | 1.11        | 3.03             | 1.10            | 1.01     | 1.00                | 0.35-26.35            |
| Charlson score    | 0.02        | 1.02             | 0.09            | 0.18     | 1.00                | 0.86-1.20             |
| BMI               | 0.02        | 1.02             | 0.04            | 0.43     | 1.00                | 0.94-1.10             |

**Table S32: Aspirin (Rheumatoid arthritis).** Multivariate Cox regression analysis. A Bonferroni correction was used to account for the 21 tested medication/indication subcohorts.

| <b>Predictor</b>  | <b>coef</b> | <b>exp(coef)</b> | <b>se(coef)</b> | <b>z</b> | <b>Pr(&gt;  z )</b> | <b>(2.5–97.5% CI)</b> |
|-------------------|-------------|------------------|-----------------|----------|---------------------|-----------------------|
| Age               | 0.08        | 1.08             | 0.01            | 5.68     | <0.001              | 1.05-1.11             |
| On drug           | 0.29        | 1.34             | 0.35            | 0.84     | 1.00                | 0.68-2.64             |
| African American  | 17.40       | 36088580.00      | 4965.37         | 0.00     | 1.00                | 0.00-inf              |
| Unknown race      | 16.99       | 23916050.00      | 4965.37         | 0.00     | 1.00                | 0.00-inf              |
| Pacific Islander  | 0.37        | 1.45             | 51884.26        | 0.00     | 1.00                | 0.00-inf              |
| Other race        | 0.01        | 1.01             | 10575.74        | 0.00     | 1.00                | 0.00-inf              |
| White             | 17.75       | 51206330.00      | 4965.37         | 0.00     | 1.00                | 0.00-inf              |
| Unknown ethnicity | 0.21        | 0.81             | 0.82            | -0.26    | 1.00                | 0.16-4.01             |
| Not Hispanic      | 1.12        | 0.33             | 0.60            | -1.85    | 1.00                | 0.10-1.07             |
| Male              | 0.82        | 2.27             | 0.38            | 2.19     | 0.60                | 1.09-4.74             |
| Non-smoker        | 0.33        | 1.39             | 0.61            | 0.54     | 1.00                | 0.42-4.63             |
| Charlson score    | 0.21        | 1.23             | 0.05            | 3.86     | 0.002               | 1.11-1.37             |
| BMI               | 0.02        | 0.98             | 0.03            | -0.63    | 1.00                | 0.94-1.03             |

Table S33: **Ibuprofen (Fever)**. Multivariate Cox regression analysis. A Bonferroni correction was used to account for the 21 tested medication/indication sub-cohorts.



| <b>Predictor</b>  | <b>coef</b> | <b>exp(coef)</b> | <b>se(coef)</b> | <b>z</b> | <b>Pr(&gt;  z )</b> | <b>(2.5–97.5% CI)</b> |
|-------------------|-------------|------------------|-----------------|----------|---------------------|-----------------------|
| Age               | 0.05        | 1.05             | 0.02            | 2.97     | 0.06                | 1.02-1.08             |
| On drug           | 0.39        | 1.47             | 0.52            | 0.75     | 1.00                | 0.54-4.04             |
| African American  | 16.41       | 13384980.00      | 5808.22         | 0.00     | 1.00                | 0.00-inf              |
| Unknown race      | 13.38       | 649347.10        | 5808.22         | 0.00     | 1.00                | 0.00-inf              |
| Other race        | 0.33        | 0.72             | 13749.40        | -0.00    | 1.00                | 0.00-inf              |
| White             | 16.61       | 16292190.00      | 5808.22         | 0.00     | 1.00                | 0.00-inf              |
| Unknown ethnicity | 1.90        | 6.69             | 1.69            | 1.12     | 1.00                | 0.24-184.25           |
| Not Hispanic      | 0.89        | 0.41             | 0.86            | -1.04    | 1.00                | 0.08-2.20             |
| Male              | 0.13        | 0.88             | 0.55            | -0.23    | 1.00                | 0.30-2.60             |
| Non-smoker        | 0.25        | 0.78             | 0.67            | -0.37    | 1.00                | 0.21-2.91             |
| Charlson score    | 0.28        | 1.33             | 0.07            | 3.99     | 0.001               | 1.16-1.53             |
| BMI               | 0.00        | 1.00             | 0.03            | -0.06    | 1.00                | 0.94-1.06             |

Table S34: **Ibuprofen (Headache)**. Multivariate Cox regression analysis. A Bonferroni correction was used to account for the 21 tested medication/indication sub-cohorts.

| <b>Predictor</b>  | <b>coef</b> | <b>exp(coef)</b> | <b>se(coef)</b> | <b>z</b> | <b>Pr(&gt;  z )</b> | <b>(2.5–97.5% CI)</b> |
|-------------------|-------------|------------------|-----------------|----------|---------------------|-----------------------|
| Age               | 0.07        | 1.07             | 0.02            | 4.15     | <0.001              | 1.04-1.11             |
| On drug           | 0.16        | 0.85             | 0.35            | -0.46    | 1.00                | 0.43-1.68             |
| African American  | 16.58       | 15856450.00      | 4194.68         | 0.00     | 1.00                | 0.00-inf              |
| Unknown race      | 17.41       | 36575760.00      | 4194.68         | 0.00     | 1.00                | 0.00-inf              |
| Other race        | 18.20       | 80005880.00      | 4194.68         | 0.00     | 1.00                | 0.00-inf              |
| White             | 16.46       | 14068130.00      | 4194.68         | 0.00     | 1.00                | 0.00-inf              |
| Unknown ethnicity | 16.56       | 0.00             | 7431.74         | -0.00    | 1.00                | 0.00-inf              |
| Not Hispanic      | 0.80        | 2.23             | 0.99            | 0.81     | 1.00                | 0.32-15.47            |
| Male              | 0.23        | 1.26             | 0.36            | 0.64     | 1.00                | 0.62-2.56             |
| Non-smoker        | 0.13        | 0.88             | 0.62            | -0.20    | 1.00                | 0.26-2.95             |
| Charlson score    | 0.23        | 1.26             | 0.05            | 4.37     | <0.001              | 1.13-1.39             |
| BMI               | 0.02        | 1.02             | 0.02            | 0.74     | 1.00                | 0.97-1.06             |

**Table S35: Ibuprofen (Osteoarthritis).** Multivariate Cox regression analysis. A Bonferroni correction was used to account for the 21 tested medication/indication subcohorts.

| <b>Predictor</b>  | <b>coef</b> | <b>exp(coef)</b> | <b>se(coef)</b> | <b>z</b> | <b>Pr(&gt;  z )</b> | <b>(2.5–97.5% CI)</b> |
|-------------------|-------------|------------------|-----------------|----------|---------------------|-----------------------|
| Age               | 0.08        | 1.08             | 0.01            | 8.36     | <0.001              | 1.06-1.10             |
| On drug           | 0.39        | 1.48             | 0.25            | 1.55     | 1.00                | 0.90-2.44             |
| African American  | 0.67        | 0.51             | 0.57            | -1.19    | 1.00                | 0.17-1.54             |
| Unknown race      | 1.82        | 0.16             | 0.71            | -2.58    | 0.21                | 0.04-0.65             |
| Pacific Islander  | 17.49       | 0.00             | 8133.82         | -0.00    | 1.00                | 0.00-inf              |
| Other race        | 16.83       | 0.00             | 2804.53         | -0.01    | 1.00                | 0.00-inf              |
| White             | 0.91        | 0.40             | 0.55            | -1.67    | 1.00                | 0.14-1.17             |
| Unknown ethnicity | 0.25        | 0.78             | 0.76            | -0.33    | 1.00                | 0.18-3.43             |
| Not Hispanic      | 1.44        | 0.24             | 0.43            | -3.35    | 0.02                | 0.10-0.55             |
| Male              | 0.91        | 2.48             | 0.26            | 3.50     | 0.010               | 1.49-4.12             |
| Non-smoker        | 0.04        | 1.04             | 0.44            | 0.09     | 1.00                | 0.44-2.49             |
| Charlson score    | 0.09        | 1.10             | 0.05            | 1.89     | 1.00                | 1.00-1.21             |
| BMI               | 0.01        | 0.99             | 0.02            | -0.47    | 1.00                | 0.96-1.03             |

Table S36: **Ibuprofen (Pain)**. Multivariate Cox regression analysis. A Bonferroni correction was used to account for the 21 tested medication/indication subcohorts.

| <b>Predictor</b>  | <b>coef</b> | <b>exp(coef)</b> | <b>se(coef)</b> | <b>z</b> | <b>Pr(&gt;  z )</b> | <b>(2.5–97.5% CI)</b> |
|-------------------|-------------|------------------|-----------------|----------|---------------------|-----------------------|
| Age               | 0.09        | 1.09             | 0.02            | 4.23     | <0.001              | 1.05-1.13             |
| On drug           | 0.93        | 0.40             | 0.50            | -1.87    | 1.00                | 0.15-1.05             |
| African American  | 1.48        | 0.23             | 1.13            | -1.32    | 1.00                | 0.02-2.07             |
| Unknown race      | 1.39        | 0.25             | 1.29            | -1.08    | 1.00                | 0.02-3.11             |
| Pacific Islander  | 16.29       | 0.00             | 34713.93        | -0.00    | 1.00                | 0.00-inf              |
| Other race        | 0.01        | 1.01             | 1.62            | 0.01     | 1.00                | 0.04-24.26            |
| White             | 0.84        | 0.43             | 1.09            | -0.77    | 1.00                | 0.05-3.63             |
| Unknown ethnicity | 17.19       | 0.00             | 4311.45         | -0.00    | 1.00                | 0.00-inf              |
| Not Hispanic      | 1.40        | 0.25             | 0.64            | -2.21    | 0.57                | 0.07-0.85             |
| Male              | 1.35        | 3.86             | 0.50            | 2.70     | 0.15                | 1.45-10.31            |
| Non-smoker        | 1.15        | 3.15             | 1.15            | 1.00     | 1.00                | 0.33-29.94            |
| Charlson score    | 0.29        | 1.34             | 0.07            | 3.99     | 0.001               | 1.16-1.55             |
| BMI               | 0.07        | 1.08             | 0.03            | 2.59     | 0.20                | 1.02-1.14             |

Table S37: **Naproxen (Pain)**. Multivariate Cox regression analysis. A Bonferroni correction was used to account for the 21 tested medication/indication subcohorts.

| <b>Predictor</b>  | <b>coef</b> | <b>exp(coef)</b> | <b>se(coef)</b> | <b>z</b> | <b>Pr(&gt;  z )</b> | <b>(2.5–97.5% CI)</b> |
|-------------------|-------------|------------------|-----------------|----------|---------------------|-----------------------|
| Age               | 0.08        | 1.08             | 0.01            | 11.94    | <0.001              | 1.07-1.09             |
| On drug           | 0.52        | 1.68             | 0.12            | 4.30     | <0.001              | 1.33-2.14             |
| African American  | 0.08        | 1.08             | 0.52            | 0.16     | 1.00                | 0.39-2.99             |
| Unknown race      | 0.40        | 0.67             | 0.57            | -0.70    | 1.00                | 0.22-2.06             |
| Pacific Islander  | 11.86       | 0.00             | 1322.32         | -0.01    | 1.00                | 0.00-inf              |
| Other race        | 0.31        | 1.36             | 0.73            | 0.42     | 1.00                | 0.33-5.67             |
| White             | 0.21        | 1.23             | 0.51            | 0.41     | 1.00                | 0.45-3.33             |
| Unknown ethnicity | 0.17        | 0.84             | 0.33            | -0.52    | 1.00                | 0.44-1.61             |
| Not Hispanic      | 0.76        | 0.47             | 0.29            | -2.63    | 0.18                | 0.27-0.82             |
| Male              | 0.56        | 1.75             | 0.12            | 4.75     | <0.001              | 1.39-2.20             |
| Non-smoker        | 0.32        | 0.73             | 0.17            | -1.87    | 1.00                | 0.52-1.02             |
| Charlson score    | 0.13        | 1.14             | 0.02            | 7.86     | <0.001              | 1.11-1.18             |
| BMI               | 0.01        | 1.01             | 0.01            | 1.07     | 1.00                | 0.99-1.02             |

Table S38: **Acetaminophen (Osteoarthritis)**. Multivariate Cox regression analysis. A Bonferroni correction was used to account for the 21 tested medication/indication subcohorts.

| <b>Predictor</b>  | <b>coef</b> | <b>exp(coef)</b> | <b>se(coef)</b> | <b>z</b> | <b>Pr(&gt;  z )</b> | <b>(2.5–97.5% CI)</b> |
|-------------------|-------------|------------------|-----------------|----------|---------------------|-----------------------|
| Age               | 0.07        | 1.07             | 0.00            | 19.27    | <0.001              | 1.06-1.08             |
| On drug           | 0.52        | 1.69             | 0.08            | 6.32     | <0.001              | 1.44-1.99             |
| African American  | 0.36        | 1.44             | 0.30            | 1.19     | 1.00                | 0.79-2.61             |
| Unknown race      | 0.18        | 1.20             | 0.34            | 0.53     | 1.00                | 0.62-2.32             |
| Pacific Islander  | 12.30       | 0.00             | 614.43          | -0.02    | 1.00                | 0.00-inf              |
| Other race        | 0.42        | 0.65             | 0.65            | -0.65    | 1.00                | 0.18-2.36             |
| White             | 0.25        | 1.28             | 0.30            | 0.83     | 1.00                | 0.71-2.30             |
| Unknown ethnicity | 0.21        | 0.81             | 0.21            | -0.98    | 1.00                | 0.53-1.23             |
| Not Hispanic      | 0.32        | 0.73             | 0.17            | -1.87    | 1.00                | 0.52-1.02             |
| Male              | 0.46        | 1.58             | 0.08            | 5.64     | <0.001              | 1.35-1.86             |
| Non-smoker        | 0.19        | 0.83             | 0.13            | -1.43    | 1.00                | 0.64-1.07             |
| Charlson score    | 0.13        | 1.14             | 0.01            | 11.17    | <0.001              | 1.12-1.17             |
| BMI               | 0.01        | 1.01             | 0.01            | 2.53     | 0.24                | 1.00-1.02             |

Table S39: **Acetaminophen (Pain)**. Multivariate Cox regression analysis. A Bonferroni correction was used to account for the 21 tested medication/indication subcohorts.

| <b>Predictor</b>  | <b>coef</b> | <b>exp(coef)</b> | <b>se(coef)</b> | <b>z</b> | <b>Pr(&gt;  z )</b> | <b>(2.5–97.5% CI)</b> |
|-------------------|-------------|------------------|-----------------|----------|---------------------|-----------------------|
| Age               | 0.09        | 1.09             | 0.02            | 3.76     | 0.004               | 1.04-1.15             |
| On drug           | 0.61        | 1.83             | 0.43            | 1.42     | 1.00                | 0.79-4.23             |
| African American  | 16.29       | 11915750.00      | 11560.05        | 0.00     | 1.00                | 0.00-inf              |
| Unknown race      | 17.67       | 47380350.00      | 11560.05        | 0.00     | 1.00                | 0.00-inf              |
| Other race        | 0.42        | 0.66             | 12733.53        | -0.00    | 1.00                | 0.00-inf              |
| White             | 16.40       | 13222450.00      | 11560.05        | 0.00     | 1.00                | 0.00-inf              |
| Unknown ethnicity | 0.45        | 0.64             | 1.21            | -0.37    | 1.00                | 0.06-6.77             |
| Not Hispanic      | 0.14        | 1.15             | 1.02            | 0.13     | 1.00                | 0.16-8.45             |
| Male              | 0.43        | 1.53             | 0.47            | 0.90     | 1.00                | 0.61-3.86             |
| Non-smoker        | 1.11        | 0.33             | 0.60            | -1.86    | 1.00                | 0.10-1.06             |
| Charlson score    | 0.09        | 0.91             | 0.10            | -0.94    | 1.00                | 0.75-1.11             |
| BMI               | 0.06        | 1.06             | 0.03            | 2.09     | 0.77                | 1.00-1.12             |

**Table S40: Acetaminophen (Rheumatoid arthritis).** Multivariate Cox regression analysis. A Bonferroni correction was used to account for the 21 tested medication/indication subcohorts.

| <b>Predictor</b>  | <b>coef</b> | <b>exp(coef)</b> | <b>se(coef)</b> | <b>z</b> | <b>Pr(&gt;  z )</b> | <b>(2.5–97.5% CI)</b> |
|-------------------|-------------|------------------|-----------------|----------|---------------------|-----------------------|
| Age               | 0.09        | 1.10             | 0.02            | 6.19     | <0.001              | 1.07-1.13             |
| On drug           | 0.42        | 1.52             | 0.34            | 1.22     | 1.00                | 0.78-2.98             |
| African American  | 0.49        | 0.61             | 1.06            | -0.46    | 1.00                | 0.08-4.94             |
| Unknown race      | 0.81        | 2.25             | 1.19            | 0.69     | 1.00                | 0.22-23.02            |
| Pacific Islander  | 16.73       | 0.00             | 19618.20        | -0.00    | 1.00                | 0.00-inf              |
| Other race        | 15.40       | 0.00             | 5220.62         | -0.00    | 1.00                | 0.00-inf              |
| White             | 0.42        | 0.66             | 1.03            | -0.41    | 1.00                | 0.09-4.96             |
| Unknown ethnicity | 16.02       | 0.00             | 4111.98         | -0.00    | 1.00                | 0.00-inf              |
| Not Hispanic      | 1.55        | 4.70             | 0.80            | 1.93     | 1.00                | 0.97-22.74            |
| Male              | 0.67        | 1.95             | 0.34            | 1.97     | 1.00                | 1.00-3.78             |
| Non-smoker        | 1.24        | 0.29             | 0.39            | -3.21    | 0.03                | 0.14-0.62             |
| Charlson score    | 0.13        | 1.14             | 0.06            | 2.23     | 0.54                | 1.02-1.27             |
| BMI               | 0.01        | 0.99             | 0.02            | -0.34    | 1.00                | 0.95-1.04             |

Table S41: **Ketorolac (Pain)**. Multivariate Cox regression analysis. A Bonferroni correction was used to account for the 21 tested medication/indication subcohorts.



| <b>Predictor</b>  | <b>coef</b> | <b>exp(coef)</b> | <b>se(coef)</b> | <b>z</b> | <b>Pr(&gt;  z )</b> | <b>(2.5–97.5% CI)</b> |
|-------------------|-------------|------------------|-----------------|----------|---------------------|-----------------------|
| Age               | 0.07        | 1.07             | 0.03            | 2.24     | 0.52                | 1.01-1.13             |
| On drug           | 0.18        | 0.83             | 0.59            | -0.31    | 1.00                | 0.26-2.63             |
| African American  | 2.65        | 0.07             | 1.26            | -2.10    | 0.75                | 0.01-0.84             |
| Unknown race      | 1.08        | 0.34             | 1.62            | -0.67    | 1.00                | 0.01-8.18             |
| Other race        | 17.11       | 0.00             | 23792.32        | -0.00    | 1.00                | 0.00-inf              |
| White             | 1.92        | 0.15             | 1.14            | -1.68    | 1.00                | 0.02-1.38             |
| Unknown ethnicity | 19.47       | 286258000.00     | 5656.78         | 0.00     | 1.00                | 0.00-inf              |
| Not Hispanic      | 17.46       | 38219070.00      | 5656.78         | 0.00     | 1.00                | 0.00-inf              |
| Male              | 0.81        | 2.24             | 0.58            | 1.39     | 1.00                | 0.72-7.01             |
| Non-smoker        | 0.84        | 0.43             | 1.09            | -0.76    | 1.00                | 0.05-3.69             |
| Charlson score    | 0.33        | 1.38             | 0.07            | 4.49     | <0.001              | 1.20-1.60             |
| BMI               | 0.02        | 0.98             | 0.05            | -0.33    | 1.00                | 0.90-1.08             |

Table S42: **Meloxicam (Osteoarthritis)**. Multivariate Cox regression analysis. A Bonferroni correction was used to account for the 21 tested medication/indication subcohorts.

| <b>Predictor</b>  | <b>coef</b> | <b>exp(coef)</b> | <b>se(coef)</b> | <b>z</b> | <b>Pr(&gt;  z )</b> | <b>(2.5–97.5% CI)</b> |
|-------------------|-------------|------------------|-----------------|----------|---------------------|-----------------------|
| Age               | 0.10        | 1.11             | 0.02            | 5.18     | <0.001              | 1.06-1.15             |
| On drug           | 0.08        | 0.92             | 0.35            | -0.23    | 1.00                | 0.47-1.82             |
| African American  | 15.55       | 5682695.00       | 4621.81         | 0.00     | 1.00                | 0.00-inf              |
| Unknown race      | 15.35       | 4638585.00       | 4621.81         | 0.00     | 1.00                | 0.00-inf              |
| Pacific Islander  | 0.89        | 0.41             | 51037.84        | -0.00    | 1.00                | 0.00-inf              |
| Other race        | 0.80        | 0.45             | 20911.46        | -0.00    | 1.00                | 0.00-inf              |
| White             | 15.99       | 8769781.00       | 4621.81         | 0.00     | 1.00                | 0.00-inf              |
| Unknown ethnicity | 16.32       | 0.00             | 8469.14         | -0.00    | 1.00                | 0.00-inf              |
| Not Hispanic      | 0.53        | 1.70             | 1.53            | 0.35     | 1.00                | 0.08-34.16            |
| Male              | 0.08        | 0.92             | 0.39            | -0.20    | 1.00                | 0.43-1.99             |
| Non-smoker        | 0.20        | 0.82             | 0.55            | -0.36    | 1.00                | 0.28-2.42             |
| Charlson score    | 0.26        | 1.29             | 0.05            | 5.53     | <0.001              | 1.18-1.42             |
| BMI               | 0.03        | 1.03             | 0.02            | 1.16     | 1.00                | 0.98-1.08             |

Table S43: **Diclofenac (Osteoarthritis)**. Multivariate Cox regression analysis. A Bonferroni correction was used to account for the 21 tested medication/indication subcohorts.

| <b>Predictor</b>  | <b>coef</b> | <b>exp(coef)</b> | <b>se(coef)</b> | <b>z</b> | <b>Pr(&gt;  z )</b> | <b>(2.5–97.5% CI)</b> |
|-------------------|-------------|------------------|-----------------|----------|---------------------|-----------------------|
| Age               | 0.09        | 1.09             | 0.02            | 5.69     | <0.001              | 1.06-1.13             |
| On drug           | 0.02        | 1.02             | 0.30            | 0.06     | 1.00                | 0.57-1.82             |
| African American  | 0.22        | 0.80             | 1.04            | -0.21    | 1.00                | 0.10-6.17             |
| Unknown race      | 0.14        | 0.87             | 1.31            | -0.10    | 1.00                | 0.07-11.30            |
| Pacific Islander  | 16.33       | 0.00             | 12129.68        | -0.00    | 1.00                | 0.00-inf              |
| Other race        | 15.53       | 0.00             | 5182.22         | -0.00    | 1.00                | 0.00-inf              |
| White             | 0.24        | 0.79             | 1.03            | -0.23    | 1.00                | 0.10-5.97             |
| Unknown ethnicity | 16.11       | 0.00             | 3393.03         | -0.00    | 1.00                | 0.00-inf              |
| Not Hispanic      | 0.14        | 1.16             | 0.84            | 0.17     | 1.00                | 0.22-5.98             |
| Male              | 0.12        | 1.13             | 0.31            | 0.40     | 1.00                | 0.62-2.07             |
| Non-smoker        | 0.26        | 0.77             | 0.45            | -0.58    | 1.00                | 0.32-1.85             |
| Charlson score    | 0.18        | 1.20             | 0.04            | 4.85     | <0.001              | 1.12-1.29             |
| BMI               | 0.03        | 1.03             | 0.02            | 1.37     | 1.00                | 0.99-1.07             |

Table S44: **Diclofenac (Pain)**. Multivariate Cox regression analysis. A Bonferoni correction was used to account for the 21 tested medication/indication sub-cohorts.

| <b>Predictor</b>  | <b>coef</b> | <b>exp(coef)</b> | <b>se(coef)</b> | <b>z</b> | <b>Pr(&gt;  z )</b> | <b>(2.5–97.5% CI)</b> |
|-------------------|-------------|------------------|-----------------|----------|---------------------|-----------------------|
| Age               | 0.13        | 1.14             | 0.05            | 2.89     | 0.08                | 1.04-1.25             |
| On drug           | 0.24        | 1.28             | 0.74            | 0.33     | 1.00                | 0.30-5.40             |
| African American  | 19.57       | 316429400.00     | 52673.33        | 0.00     | 1.00                | 0.00-inf              |
| Unknown race      | 19.64       | 337045900.00     | 52673.33        | 0.00     | 1.00                | 0.00-inf              |
| Pacific Islander  | 1.26        | 0.28             | 93962.46        | -0.00    | 1.00                | 0.00-inf              |
| White             | 18.23       | 82827400.00      | 52673.33        | 0.00     | 1.00                | 0.00-inf              |
| Unknown ethnicity | 18.47       | 0.00             | 15036.75        | -0.00    | 1.00                | 0.00-inf              |
| Not Hispanic      | 0.39        | 1.48             | 3.43            | 0.11     | 1.00                | 0.00-1236.02          |
| Male              | 0.47        | 1.60             | 0.75            | 0.63     | 1.00                | 0.37-6.96             |
| Non-smoker        | 18.45       | 103329700.00     | 12688.83        | 0.00     | 1.00                | 0.00-inf              |
| Charlson score    | 0.12        | 1.13             | 0.12            | 0.98     | 1.00                | 0.89-1.44             |
| BMI               | 0.00        | 1.00             | 0.05            | 0.09     | 1.00                | 0.91-1.11             |

Table S45: Celecoxib (Osteoarthritis). Multivariate Cox regression analysis. A Bonferroni correction was used to account for the 21 tested medication/indication subcohorts.

| <b>Predictor</b>  | <b>coef</b> | <b>exp(coef)</b> | <b>se(coef)</b> | <b>z</b> | <b>Pr(&gt;  z )</b> | <b>(2.5–97.5% CI)</b> |
|-------------------|-------------|------------------|-----------------|----------|---------------------|-----------------------|
| Age               | 0.06        | 1.06             | 0.03            | 1.88     | 1.00                | 1.00-1.13             |
| On drug           | 0.83        | 0.43             | 0.63            | -1.32    | 1.00                | 0.13-1.50             |
| African American  | 20.14       | 557589900.00     | 195494.30       | 0.00     | 1.00                | 0.00-inf              |
| Unknown race      | 1.98        | 7.22             | 195910.10       | 0.00     | 1.00                | 0.00-inf              |
| Other race        | 0.04        | 0.96             | 204304.80       | -0.00    | 1.00                | 0.00-inf              |
| White             | 19.21       | 219127600.00     | 195494.30       | 0.00     | 1.00                | 0.00-inf              |
| Unknown ethnicity | 0.02        | 1.02             | 31199.33        | 0.00     | 1.00                | 0.00-inf              |
| Not Hispanic      | 18.04       | 68117330.00      | 15332.49        | 0.00     | 1.00                | 0.00-inf              |
| Male              | 1.45        | 4.28             | 0.62            | 2.36     | 0.38                | 1.28-14.33            |
| Non-smoker        | 18.95       | 169173000.00     | 10763.77        | 0.00     | 1.00                | 0.00-inf              |
| Charlson score    | 0.30        | 1.35             | 0.11            | 2.58     | 0.20                | 1.07-1.69             |
| BMI               | 0.03        | 0.97             | 0.05            | -0.52    | 1.00                | 0.88-1.08             |

Table S46: **Celecoxib (Pain)**. Multivariate Cox regression analysis. A Bonferroni correction was used to account for the 21 tested medication/indication subcohorts.

| <b>Covariate</b>  | <b>Odds Ratio (2.5–97.5% CI)</b> | <b>t-value</b> | <b>p-value</b> |
|-------------------|----------------------------------|----------------|----------------|
| Age               | 1.03 (1.03-1.04)                 | 20.51          | <0.001         |
| On drug           | 4.09 (3.72-4.50)                 | 28.97          | <0.001         |
| African American  | 1.40 (1.02-1.93)                 | 2.06           | 0.31           |
| Unknown race      | 1.02 (0.71-1.47)                 | 0.12           | 1.00           |
| Pacific Islander  | 1.92 (0.71-5.16)                 | 1.29           | 1.00           |
| Other race        | 1.24 (0.71-2.15)                 | 0.75           | 1.00           |
| White             | 0.80 (0.58-1.09)                 | -1.42          | 1.00           |
| Unknown ethnicity | 1.08 (0.81-1.43)                 | 0.50           | 1.00           |
| Not Hispanic      | 0.57 (0.48-0.69)                 | -5.90          | <0.001         |
| Male              | 1.37 (1.25-1.51)                 | 6.72           | <0.001         |
| Non-smoker        | 0.93 (0.80-1.08)                 | -0.98          | 1.00           |
| Charlson score    | 1.10 (1.08-1.12)                 | 9.34           | <0.001         |
| BMI               | 1.01 (1.00-1.01)                 | 1.68           | 0.74           |

Table **S47: aspirin (entire subcohort)**. Ordinal logistic regression analysis. A Bonferroni correction was used to account for the 8 tested medication subcohorts.

| <b>Covariate</b>  | <b>Odds Ratio (2.5–97.5% CI)</b> | <b>t-value</b> | <b>p-value</b> |
|-------------------|----------------------------------|----------------|----------------|
| Age               | 1.02 (1.02-1.03)                 | 18.49          | <0.001         |
| On drug           | 4.03 (3.69-4.40)                 | 31.25          | <0.001         |
| African American  | 1.33 (1.02-1.72)                 | 2.11           | 0.28           |
| Unknown race      | 0.96 (0.72-1.28)                 | -0.28          | 1.00           |
| Pacific Islander  | 0.93 (0.36-2.43)                 | -0.15          | 1.00           |
| Other race        | 0.82 (0.54-1.23)                 | -0.96          | 1.00           |
| White             | 0.74 (0.57-0.96)                 | -2.25          | 0.20           |
| Unknown ethnicity | 0.90 (0.69-1.18)                 | -0.77          | 1.00           |
| Not Hispanic      | 0.57 (0.49-0.66)                 | -7.50          | <0.001         |
| Male              | 1.29 (1.18-1.40)                 | 5.78           | <0.001         |
| Non-smoker        | 0.75 (0.65-0.86)                 | -3.99          | <0.001         |
| Charlson score    | 1.13 (1.09-1.16)                 | 7.01           | <0.001         |
| BMI               | 1.00 (1.00-1.01)                 | 1.85           | 0.51           |

Table S48: **ibuprofen (entire subcohort)**. Ordinal logistic regression analysis. A Bonferroni correction was used to account for the 8 tested medication subcohorts.

| <b>Covariate</b>  | <b>Odds Ratio (2.5–97.5% CI)</b> | <b>t-value</b> | <b>p-value</b> |
|-------------------|----------------------------------|----------------|----------------|
| Age               | 1.02 (1.02-1.03)                 | 18.05          | <0.001         |
| On drug           | 3.99 (3.65-4.35)                 | 31.08          | <0.001         |
| African American  | 1.11 (0.85-1.45)                 | 0.77           | 1.00           |
| Unknown race      | 0.79 (0.59-1.06)                 | -1.59          | 0.90           |
| Pacific Islander  | 0.62 (0.23-1.66)                 | -0.96          | 1.00           |
| Other race        | 0.76 (0.51-1.13)                 | -1.35          | 1.00           |
| White             | 0.64 (0.49-0.83)                 | -3.31          | 0.007          |
| Unknown ethnicity | 1.02 (0.78-1.33)                 | 0.13           | 1.00           |
| Not Hispanic      | 0.56 (0.49-0.65)                 | -7.79          | <0.001         |
| Male              | 1.30 (1.19-1.41)                 | 5.96           | <0.001         |
| Non-smoker        | 0.80 (0.69-0.92)                 | -3.08          | 0.02           |
| Charlson score    | 1.12 (1.09-1.16)                 | 6.86           | <0.001         |
| BMI               | 1.01 (1.00-1.01)                 | 1.91           | 0.45           |

Table S49: **naproxen (entire subcohort)**. Ordinal logistic regression analysis. A Bonferroni correction was used to account for the 8 tested medication subcohorts.



| <b>Covariate</b>  | <b>Odds Ratio (2.5–97.5% CI)</b> | <b>t-value</b> | <b>p-value</b> |
|-------------------|----------------------------------|----------------|----------------|
| Age               | 1.03 (1.03-1.03)                 | 43.52          | <0.001         |
| On drug           | 9.16 (8.72-9.63)                 | 88.16          | <0.001         |
| African American  | 1.15 (1.00-1.31)                 | 1.96           | 0.40           |
| Unknown race      | 0.75 (0.65-0.87)                 | -3.75          | 0.001          |
| Pacific Islander  | 1.32 (0.84-2.08)                 | 1.22           | 1.00           |
| Other race        | 0.84 (0.67-1.06)                 | -1.48          | 1.00           |
| White             | 0.62 (0.54-0.71)                 | -7.09          | <0.001         |
| Unknown ethnicity | 1.06 (0.95-1.18)                 | 0.99           | 1.00           |
| Not Hispanic      | 0.58 (0.53-0.63)                 | -13.60         | <0.001         |
| Male              | 1.33 (1.27-1.39)                 | 12.35          | <0.001         |
| Non-smoker        | 0.80 (0.74-0.88)                 | -5.06          | <0.001         |
| Charlson score    | 1.13 (1.12-1.15)                 | 18.43          | <0.001         |
| BMI               | 1.01 (1.00-1.01)                 | 4.02           | <0.001         |

Table S50: **acetaminophen (entire subcohort)**. Ordinal logistic regression analysis. A Bonferroni correction was used to account for the 8 tested medication subcohorts.

| <b>Covariate</b>  | <b>Odds Ratio (2.5–97.5% CI)</b> | <b>t-value</b> | <b>p-value</b> |
|-------------------|----------------------------------|----------------|----------------|
| Age               | 1.02 (1.02-1.02)                 | 11.93          | <0.001         |
| On drug           | 6.42 (5.70-7.22)                 | 30.79          | <0.001         |
| African American  | 0.86 (0.62-1.21)                 | -0.85          | 1.00           |
| Unknown race      | 0.73 (0.50-1.06)                 | -1.68          | 0.75           |
| Pacific Islander  | 0.88 (0.13-6.08)                 | -0.13          | 1.00           |
| Other race        | 0.68 (0.40-1.16)                 | -1.42          | 1.00           |
| White             | 0.49 (0.35-0.68)                 | -4.22          | <0.001         |
| Unknown ethnicity | 1.11 (0.71-1.73)                 | 0.45           | 1.00           |
| Not Hispanic      | 0.69 (0.57-0.82)                 | -4.11          | <0.001         |
| Male              | 1.27 (1.14-1.43)                 | 4.18           | <0.001         |
| Non-smoker        | 0.66 (0.54-0.82)                 | -3.83          | 0.001          |
| Charlson score    | 1.15 (1.10-1.20)                 | 6.02           | <0.001         |
| BMI               | 1.01 (1.01-1.02)                 | 3.31           | 0.008          |

Table **S51: ketorolac (entire subcohort)**. Ordinal logistic regression analysis. A Bonferroni correction was used to account for the 8 tested medication subcohorts.

| <b>Covariate</b>  | <b>Odds Ratio (2.5–97.5% CI)</b> | <b>t-value</b> | <b>p-value</b> |
|-------------------|----------------------------------|----------------|----------------|
| Age               | 1.03 (1.02-1.03)                 | 7.25           | <0.001         |
| On drug           | 0.75 (0.61-0.93)                 | -2.70          | 0.06           |
| African American  | 0.80 (0.41-1.56)                 | -0.65          | 1.00           |
| Unknown race      | 0.64 (0.29-1.41)                 | -1.11          | 1.00           |
| Pacific Islander  | 0.97 (0.17-5.48)                 | -0.04          | 1.00           |
| Other race        | 0.76 (0.30-1.97)                 | -0.56          | 1.00           |
| White             | 0.37 (0.19-0.71)                 | -2.99          | 0.02           |
| Unknown ethnicity | 1.12 (0.56-2.25)                 | 0.32           | 1.00           |
| Not Hispanic      | 0.66 (0.42-1.02)                 | -1.88          | 0.48           |
| Male              | 1.34 (1.08-1.65)                 | 2.65           | 0.07           |
| Non-smoker        | 0.44 (0.30-0.64)                 | -4.32          | <0.001         |
| Charlson score    | 1.26 (1.18-1.35)                 | 6.75           | <0.001         |
| BMI               | 1.01 (1.00-1.02)                 | 1.58           | 0.92           |

Table S52: **meloxicam (entire subcohort)**. Ordinal logistic regression analysis. A Bonferroni correction was used to account for the 8 tested medication subcohorts.

| <b>Covariate</b>  | <b>Odds Ratio (2.5–97.5% CI)</b> | <b>t-value</b> | <b>p-value</b> |
|-------------------|----------------------------------|----------------|----------------|
| Age               | 1.03 (1.03-1.04)                 | 10.27          | <0.001         |
| On drug           | 0.96 (0.80-1.16)                 | -0.39          | 1.00           |
| African American  | 0.83 (0.50-1.38)                 | -0.70          | 1.00           |
| Unknown race      | 0.59 (0.30-1.14)                 | -1.58          | 0.91           |
| Pacific Islander  | 0.72 (0.10-5.25)                 | -0.32          | 1.00           |
| Other race        | 1.14 (0.22-5.85)                 | 0.16           | 1.00           |
| White             | 0.40 (0.25-0.67)                 | -3.56          | 0.003          |
| Unknown ethnicity | 0.88 (0.39-2.01)                 | -0.30          | 1.00           |
| Not Hispanic      | 0.64 (0.39-1.02)                 | -1.86          | 0.50           |
| Male              | 1.30 (1.07-1.58)                 | 2.65           | 0.06           |
| Non-smoker        | 0.69 (0.51-0.92)                 | -2.48          | 0.11           |
| Charlson score    | 1.15 (1.10-1.20)                 | 6.28           | <0.001         |
| BMI               | 1.01 (1.00-1.02)                 | 1.69           | 0.74           |

Table S53: **diclofenac (entire subcohort)**. Ordinal logistic regression analysis. A Bonferroni correction was used to account for the 8 tested medication subcohorts.

| <b>Covariate</b>  | <b>Odds Ratio (2.5–97.5% CI)</b> | <b>t-value</b> | <b>p-value</b> |
|-------------------|----------------------------------|----------------|----------------|
| Age               | 1.04 (1.03-1.05)                 | 5.90           | <0.001         |
| On drug           | 1.43 (1.05-1.96)                 | 2.24           | 0.20           |
| African American  | 1.14 (0.29-4.47)                 | 0.19           | 1.00           |
| Unknown race      | 0.40 (0.08-1.89)                 | -1.16          | 1.00           |
| Pacific Islander  | 0.40 (0.02-8.79)                 | -0.58          | 1.00           |
| Other race        | 0.95 (0.15-6.03)                 | -0.05          | 1.00           |
| White             | 0.41 (0.11-1.55)                 | -1.31          | 1.00           |
| Unknown ethnicity | 2.28 (0.77-6.74)                 | 1.49           | 1.00           |
| Not Hispanic      | 0.68 (0.30-1.54)                 | -0.93          | 1.00           |
| Male              | 1.27 (0.91-1.77)                 | 1.41           | 1.00           |
| Non-smoker        | 0.68 (0.38-1.22)                 | -1.30          | 1.00           |
| Charlson score    | 1.16 (1.07-1.25)                 | 3.69           | 0.002          |
| BMI               | 1.01 (0.99-1.03)                 | 0.76           | 1.00           |

Table S54: celecoxib (entire subcohort). Ordinal logistic regression analysis. A Bonferroni correction was used to account for the 8 tested medication subcohorts.

| <b>Predictor</b>  | <b>coef</b> | <b>exp(coef)</b> | <b>se(coef)</b> | <b>z</b> | <b>Pr(&gt;  z )</b> | <b>(2.5–97.5% CI)</b> |
|-------------------|-------------|------------------|-----------------|----------|---------------------|-----------------------|
| Age               | 0.06        | 1.07             | 0.01            | 12.51    | <0.001              | 1.06-1.08             |
| On drug           | 0.48        | 1.61             | 0.11            | 4.48     | <0.001              | 1.31-1.99             |
| African American  | 0.63        | 1.87             | 0.47            | 1.34     | 1.00                | 0.75-4.66             |
| Unknown race      | 0.24        | 1.27             | 0.51            | 0.47     | 1.00                | 0.47-3.47             |
| Pacific Islander  | 12.18       | 0.00             | 951.06          | -0.01    | 1.00                | 0.00-inf              |
| Other race        | 0.58        | 1.78             | 0.84            | 0.69     | 1.00                | 0.34-9.33             |
| White             | 0.48        | 1.62             | 0.46            | 1.04     | 1.00                | 0.66-3.98             |
| Unknown ethnicity | 0.10        | 1.11             | 0.30            | 0.34     | 1.00                | 0.62-1.99             |
| Not Hispanic      | 0.37        | 0.69             | 0.22            | -1.65    | 0.80                | 0.45-1.07             |
| Male              | 0.48        | 1.61             | 0.11            | 4.40     | <0.001              | 1.30-1.99             |
| Non-smoker        | 0.03        | 0.97             | 0.17            | -0.16    | 1.00                | 0.70-1.36             |
| Charlson score    | 0.09        | 1.09             | 0.02            | 5.46     | <0.001              | 1.06-1.13             |
| BMI               | 0.01        | 1.01             | 0.01            | 1.50     | 1.00                | 1.00-1.03             |

Table S55: **aspirin (entire subcohort)**. Multivariate Cox regression analysis. A Bonferroni correction was used to account for the 8 tested medication subcohorts. Cohort size: 4921.

| <b>Predictor</b>  | <b>coef</b> | <b>exp(coef)</b> | <b>se(coef)</b> | <b>z</b> | <b>Pr(&gt;  z )</b> | <b>(2.5–97.5% CI)</b> |
|-------------------|-------------|------------------|-----------------|----------|---------------------|-----------------------|
| Age               | 0.07        | 1.08             | 0.01            | 10.16    | <0.001              | 1.06-1.09             |
| On drug           | 0.09        | 0.91             | 0.20            | -0.45    | 1.00                | 0.62-1.35             |
| African American  | 0.06        | 1.06             | 0.61            | 0.10     | 1.00                | 0.32-3.51             |
| Unknown race      | 0.42        | 1.52             | 0.70            | 0.60     | 1.00                | 0.38-6.02             |
| Pacific Islander  | 12.91       | 0.00             | 1758.36         | -0.01    | 1.00                | 0.00-inf              |
| Other race        | 0.08        | 1.08             | 1.19            | 0.07     | 1.00                | 0.10-11.24            |
| White             | 0.27        | 0.77             | 0.60            | -0.44    | 1.00                | 0.23-2.51             |
| Unknown ethnicity | 0.11        | 0.90             | 0.62            | -0.18    | 1.00                | 0.27-3.01             |
| Not Hispanic      | 0.02        | 0.98             | 0.39            | -0.05    | 1.00                | 0.46-2.12             |
| Male              | 0.75        | 2.12             | 0.21            | 3.66     | 0.002               | 1.42-3.16             |
| Non-smoker        | 0.03        | 0.97             | 0.38            | -0.07    | 1.00                | 0.47-2.03             |
| Charlson score    | 0.09        | 1.09             | 0.05            | 1.86     | 0.50                | 1.00-1.19             |
| BMI               | 0.01        | 1.01             | 0.01            | 0.48     | 1.00                | 0.98-1.04             |

Table **S56: ibuprofen (entire subcohort)**. Multivariate Cox regression analysis. A Bonferroni correction was used to account for the 8 tested medication subcohorts. Cohort size: 5737.

| <b>Predictor</b>  | <b>coef</b> | <b>exp(coef)</b> | <b>se(coef)</b> | <b>z</b> | <b>Pr(&gt;  z )</b> | <b>(2.5–97.5% CI)</b> |
|-------------------|-------------|------------------|-----------------|----------|---------------------|-----------------------|
| Age               | 0.08        | 1.08             | 0.02            | 3.88     | <0.001              | 1.04-1.13             |
| On drug           | 0.44        | 0.64             | 0.50            | -0.89    | 1.00                | 0.24-1.71             |
| African American  | 16.24       | 11299020.00      | 7936.72         | 0.00     | 1.00                | 0.00-inf              |
| Unknown race      | 16.01       | 8999436.00       | 7936.72         | 0.00     | 1.00                | 0.00-inf              |
| Pacific Islander  | 2.66        | 14.29            | 37651.47        | 0.00     | 1.00                | 0.00-inf              |
| Other race        | 0.67        | 0.51             | 10435.49        | -0.00    | 1.00                | 0.00-inf              |
| White             | 15.92       | 8177486.00       | 7936.72         | 0.00     | 1.00                | 0.00-inf              |
| Unknown ethnicity | 0.68        | 1.97             | 1.29            | 0.53     | 1.00                | 0.16-24.48            |
| Not Hispanic      | 0.08        | 1.08             | 1.03            | 0.07     | 1.00                | 0.14-8.18             |
| Male              | 0.55        | 1.74             | 0.49            | 1.12     | 1.00                | 0.66-4.55             |
| Non-smoker        | 0.28        | 0.75             | 0.78            | -0.37    | 1.00                | 0.16-3.44             |
| Charlson score    | 0.22        | 1.25             | 0.07            | 3.35     | 0.006               | 1.10-1.42             |
| BMI               | 0.02        | 1.02             | 0.03            | 0.55     | 1.00                | 0.96-1.08             |

Table **S57: naproxen (entire subcohort)**. Multivariate Cox regression analysis. A Bonferroni correction was used to account for the 8 tested medication subcohorts. Cohort size: 1579.



| <b>Predictor</b>  | <b>coef</b> | <b>exp(coef)</b> | <b>se(coef)</b> | <b>z</b> | <b>Pr(&gt;  z )</b> | <b>(2.5–97.5% CI)</b> |
|-------------------|-------------|------------------|-----------------|----------|---------------------|-----------------------|
| Age               | 0.07        | 1.07             | 0.00            | 23.73    | <0.001              | 1.07-1.08             |
| On drug           | 0.48        | 1.61             | 0.07            | 6.86     | <0.001              | 1.40-1.84             |
| African American  | 0.01        | 0.99             | 0.22            | -0.07    | 1.00                | 0.64-1.51             |
| Unknown race      | 0.20        | 0.81             | 0.25            | -0.83    | 1.00                | 0.50-1.32             |
| Pacific Islander  | 0.71        | 0.49             | 1.02            | -0.69    | 1.00                | 0.07-3.66             |
| Other race        | 0.14        | 0.87             | 0.46            | -0.29    | 1.00                | 0.35-2.16             |
| White             | 0.23        | 0.79             | 0.21            | -1.11    | 1.00                | 0.52-1.20             |
| Unknown ethnicity | 0.33        | 0.72             | 0.18            | -1.83    | 0.54                | 0.51-1.02             |
| Not Hispanic      | 0.44        | 0.64             | 0.14            | -3.24    | 0.009               | 0.49-0.84             |
| Male              | 0.59        | 1.81             | 0.07            | 8.38     | <0.001              | 1.58-2.08             |
| Non-smoker        | 0.05        | 0.95             | 0.13            | -0.36    | 1.00                | 0.74-1.23             |
| Charlson score    | 0.11        | 1.12             | 0.01            | 9.62     | <0.001              | 1.10-1.15             |
| BMI               | 0.01        | 1.01             | 0.00            | 2.96     | 0.02                | 1.00-1.02             |

Table **S58**: **acetaminophen (entire subcohort)**. Multivariate Cox regression analysis. A Bonferroni correction was used to account for the 8 tested medication subcohorts. Cohort size: 20826.

| <b>Predictor</b>  | <b>coef</b> | <b>exp(coef)</b> | <b>se(coef)</b> | <b>z</b> | <b>Pr(&gt;  z )</b> | <b>(2.5–97.5% CI)</b> |
|-------------------|-------------|------------------|-----------------|----------|---------------------|-----------------------|
| Age               | 0.09        | 1.09             | 0.01            | 8.32     | <0.001              | 1.07-1.11             |
| On drug           | 0.17        | 0.85             | 0.24            | -0.69    | 1.00                | 0.52-1.37             |
| African American  | 0.53        | 1.71             | 1.03            | 0.52     | 1.00                | 0.23-12.94            |
| Unknown race      | 0.39        | 1.48             | 1.13            | 0.35     | 1.00                | 0.16-13.42            |
| Pacific Islander  | 13.32       | 0.00             | 12935.27        | -0.00    | 1.00                | 0.00-inf              |
| Other race        | 14.85       | 0.00             | 2016.08         | -0.01    | 1.00                | 0.00-inf              |
| White             | 0.44        | 1.55             | 1.02            | 0.43     | 1.00                | 0.21-11.40            |
| Unknown ethnicity | 0.19        | 0.82             | 0.79            | -0.25    | 1.00                | 0.18-3.84             |
| Not Hispanic      | 0.36        | 0.70             | 0.46            | -0.78    | 1.00                | 0.28-1.73             |
| Male              | 0.80        | 2.23             | 0.24            | 3.28     | 0.008               | 1.38-3.60             |
| Non-smoker        | 0.34        | 0.71             | 0.38            | -0.89    | 1.00                | 0.34-1.50             |
| Charlson score    | 0.14        | 1.15             | 0.04            | 3.17     | 0.01                | 1.05-1.26             |
| BMI               | 0.01        | 1.01             | 0.02            | 0.58     | 1.00                | 0.98-1.04             |

Table S59: **ketorolac (entire subcohort)**. Multivariate Cox regression analysis. A Bonferroni correction was used to account for the 8 tested medication subcohorts. Cohort size: 3331.

| <b>Predictor</b>  | <b>coef</b> | <b>exp(coef)</b> | <b>se(coef)</b> | <b>z</b> | <b>Pr(&gt;  z )</b> | <b>(2.5–97.5% CI)</b> |
|-------------------|-------------|------------------|-----------------|----------|---------------------|-----------------------|
| Age               | 0.05        | 1.06             | 0.02            | 3.34     | 0.007               | 1.02-1.09             |
| On drug           | 0.83        | 0.44             | 0.40            | -2.08    | 0.30                | 0.20-0.95             |
| African American  | 0.53        | 1.71             | 1.17            | 0.46     | 1.00                | 0.17-17.02            |
| Unknown race      | 1.04        | 2.83             | 1.41            | 0.74     | 1.00                | 0.18-44.71            |
| Other race        | 14.75       | 0.00             | 4699.16         | -0.00    | 1.00                | 0.00-inf              |
| White             | 1.14        | 3.13             | 1.15            | 1.00     | 1.00                | 0.33-29.67            |
| Unknown ethnicity | 0.67        | 0.51             | 1.16            | -0.58    | 1.00                | 0.05-4.92             |
| Not Hispanic      | 1.20        | 0.30             | 0.68            | -1.76    | 0.62                | 0.08-1.14             |
| Male              | 0.22        | 1.25             | 0.38            | 0.59     | 1.00                | 0.59-2.63             |
| Non-smoker        | 0.24        | 1.27             | 0.77            | 0.32     | 1.00                | 0.28-5.73             |
| Charlson score    | 0.26        | 1.30             | 0.06            | 4.35     | <0.001              | 1.16-1.47             |
| BMI               | 0.03        | 1.03             | 0.03            | 0.99     | 1.00                | 0.98-1.08             |

**Table S60: meloxicam (entire subcohort).** Multivariate Cox regression analysis. A Bonferroni correction was used to account for the 8 tested medication subcohorts. Cohort size: 1172.

| <b>Predictor</b>  | <b>coef</b> | <b>exp(coef)</b> | <b>se(coef)</b> | <b>z</b> | <b>Pr(&gt;  z )</b> | <b>(2.5–97.5% CI)</b> |
|-------------------|-------------|------------------|-----------------|----------|---------------------|-----------------------|
| Age               | 0.10        | 1.10             | 0.01            | 6.75     | <0.001              | 1.07-1.13             |
| On drug           | 0.42        | 0.66             | 0.28            | -1.49    | 1.00                | 0.38-1.14             |
| African American  | 0.85        | 0.43             | 0.82            | -1.03    | 1.00                | 0.09-2.14             |
| Unknown race      | 0.22        | 1.25             | 1.06            | 0.21     | 1.00                | 0.16-9.92             |
| Pacific Islander  | 16.75       | 0.00             | 10111.99        | -0.00    | 1.00                | 0.00-inf              |
| Other race        | 15.82       | 0.00             | 12915.74        | -0.00    | 1.00                | 0.00-inf              |
| White             | 0.48        | 0.62             | 0.79            | -0.61    | 1.00                | 0.13-2.90             |
| Unknown ethnicity | 16.48       | 0.00             | 3727.18         | -0.00    | 1.00                | 0.00-inf              |
| Not Hispanic      | 0.17        | 1.19             | 0.81            | 0.21     | 1.00                | 0.24-5.82             |
| Male              | 0.04        | 0.96             | 0.30            | -0.13    | 1.00                | 0.54-1.72             |
| Non-smoker        | 0.45        | 1.56             | 0.56            | 0.80     | 1.00                | 0.53-4.64             |
| Charlson score    | 0.14        | 1.15             | 0.04            | 3.16     | 0.01                | 1.05-1.25             |
| BMI               | 0.04        | 1.04             | 0.02            | 1.73     | 0.67                | 1.00-1.08             |

Table **S61: diclofenac (entire subcohort)**. Multivariate Cox regression analysis. A Bonferroni correction was used to account for the 8 tested medication subcohorts. Cohort size: 1367.

| <b>Predictor</b>  | <b>coef</b> | <b>exp(coef)</b> | <b>se(coef)</b> | <b>z</b> | <b>Pr(&gt;  z )</b> | <b>(2.5–97.5% CI)</b> |
|-------------------|-------------|------------------|-----------------|----------|---------------------|-----------------------|
| Age               | 0.10        | 1.11             | 0.04            | 2.58     | 0.08                | 1.02-1.20             |
| On drug           | 1.04        | 0.35             | 0.71            | -1.47    | 1.00                | 0.09-1.42             |
| African American  | 0.44        | 0.65             | 1.34            | -0.33    | 1.00                | 0.05-8.86             |
| Unknown race      | 1.54        | 0.21             | 2.08            | -0.74    | 1.00                | 0.00-12.60            |
| Pacific Islander  | 22.94       | 0.00             | 116630.60       | -0.00    | 1.00                | 0.00-inf              |
| Other race        | 17.07       | 0.00             | 44094.66        | -0.00    | 1.00                | 0.00-inf              |
| White             | 2.60        | 0.07             | 1.29            | -2.02    | 0.34                | 0.01-0.92             |
| Unknown ethnicity | 19.57       | 314859200.00     | 10666.63        | 0.00     | 1.00                | 0.00-inf              |
| Not Hispanic      | 17.76       | 51902670.00      | 10666.63        | 0.00     | 1.00                | 0.00-inf              |
| Male              | 2.12        | 8.35             | 0.82            | 2.60     | 0.08                | 1.68-41.48            |
| Non-smoker        | 17.27       | 31799360.00      | 7693.96         | 0.00     | 1.00                | 0.00-inf              |
| Charlson score    | 0.17        | 0.84             | 0.21            | -0.82    | 1.00                | 0.56-1.27             |
| BMI               | 0.06        | 0.94             | 0.05            | -1.20    | 1.00                | 0.85-1.04             |

Table S62: celecoxib (entire subcohort). Multivariate Cox regression analysis. A Bonferroni correction was used to account for the 8 tested medication subcohorts. Cohort size: 460.
